# Supplementary material
Source: ML conference proceedings conference paper supplement (https://openreview.net/forum?id=mVCsM9xJMd)
Supplement: supplementary_material [file TALES___ICLR_2026_Appendix.pdf › tale-suite-main/TALES___ICLR_2026_Appendix.pdf]

## A ALL AGENT AVERAGE SCORES PER FRAMEWORK

In Table 5, we include the average scores per framework and average-per-game score of all LLM agents.

| Model                                  | TEXTWORLD | TEXTWORLDEXPRESS | ALFWORLD | SCIENCEWORLD | JERICO | Average Score |
|----------------------------------------|-----------|------------------|----------|--------------|--------|---------------|
| o3 (medium)                            | 100       | 91.9             | 88.3     | 93.0         | 15.7   | 58.7          |
| o3 (high)                              | 100       | 89.6             | 81.7     | 93.1         | 16.1   | 58.0          |
| gpt-5 (thinking)                       | 100       | 75.5             | 93.3     | 91.8         | 17.2   | 57.5          |
| o3 (low)                               | 99.1      | 89.8             | 70.0     | 88.3         | 14.2   | 54.8          |
| claude-3.7-sonnet (thinking)           | 97.3      | 91.3             | 83.3     | 76.5         | 12.5   | 52.5          |
| claude-3.7-sonnet                      | 97.3      | 95.8             | 81.7     | 72.4         | 13.0   | 52.1          |
| claude-3.5-sonnet-latest               | 95.5      | 81.6             | 75.0     | 82.3         | 9.6    | 50.4          |
| gpt-4.1                                | 95.3      | 92.5             | 83.3     | 76.1         | 6.8    | 49.9          |
| gpt-5-mini (thinking)                  | 94.7      | 61.9             | 61.7     | 82.7         | 9.5    | 46.5          |
| o1                                     | 97.8      | 70.2             | 28.3     | 80.1         | 10.3   | 44.2          |
| gpt-4o                                 | 83.6      | 80.6             | 56.7     | 61.4         | 5.6    | 40.6          |
| claude-3.5-haiku                       | 94.9      | 79.8             | 26.7     | 67.3         | 5.0    | 39.6          |
| Llama-3.1-405B-Instruct                | 90.9      | 79.2             | 31.7     | 51.8         | 6.1    | 36.4          |
| gemini-2.0-flash                       | 80.8      | 76.1             | 20.0     | 57.1         | 5.4    | 35.0          |
| Qwen3-32B                              | 79.5      | 68.9             | 48.3     | 49.8         | 4.0    | 34.3          |
| Llama-3.7-70B-Instruct                 | 69.6      | 77.2             | 15.0     | 55.1         | 4.5    | 32.8          |
| Llama-3.1-70B-Instruct                 | 65.6      | 81.9             | 8.3      | 51.9         | 5.3    | 32.0          |
| Qwen2.5-72B-Instruct                   | 76.5      | 83.8             | 36.7     | 35.0         | 2.9    | 30.7          |
| Mistral-Large-Instruct-2407            | 82.4      | 68.3             | 6.7      | 46.1         | 5.8    | 30.3          |
| gpt-4.1-mini                           | 62.1      | 74.5             | 5.0      | 41.9         | 3.4    | 27.1          |
| gpt-4o-mini                            | 56.5      | 73.6             | 0.0      | 27.2         | 1.8    | 21.8          |
| Llama-4-Scout-17B-16E-Instruct         | 41.1      | 68.4             | 0.0      | 27.0         | 1.8    | 19.8          |
| gpt-5-nano                             | 50.1      | 41.3             | 1.7      | 32.0         | 1.7    | 18.3          |
| Llama-4-Maverick-17B-128E-Instruct-FP8 | 43.5      | 56.1             | 8.3      | 11.5         | 2.0    | 15.5          |
| Mistral-Small-Instruct-2409            | 56.1      | 27.3             | 0.0      | 24.4         | 1.4    | 14.8          |
| Llama-3.1-8B-Instruct                  | 29.7      | 50.3             | 0.0      | 15.7         | 2.3    | 13.9          |
| DeepSeek-R1                            | 37.1      | 38.6             | 0.0      | 15.8         | 1.0    | 12.4          |
| Qwen2.5-7B-Instruct                    | 27.7      | 45.6             | 0.0      | 12.6         | 0.7    | 11.7          |
| Llama-3.2-3B-Instruct                  | 21.4      | 42.0             | 0.0      | 10.0         | 1.5    | 10.4          |
| phi-4                                  | 20.8      | 43.8             | 0.0      | 8.9          | 1.6    | 10.3          |
| gpt-4.1-nano                           | 12.8      | 38.7             | 0.0      | 9.4          | 3.6    | 10.0          |
| Mistral-Small-24B-Instruct-2501        | 15.8      | 23.0             | 0.0      | 15.8         | 1.4    | 8.8           |
| DeepSeek-R1-Distill-Llama-70B          | 8.7       | 39.8             | 0.0      | 7.7          | 1.3    | 8.4           |
| Ministral-8B-Instruct-2410             | 10.9      | 22.8             | 0.0      | 2.3          | 0.4    | 4.6           |
| Mistral-Small-3.1-24B-Instruct-2503    | 2.5       | 10.3             | 0.0      | 10.5         | 0.8    | 4.5           |
| Mixtral-8x22B-Instruct-v0.1            | 17.1      | 8.4              | 0.0      | 4.0          | 0.4    | 3.7           |
| Llama-3.2-1B-Instruct                  | 0.0       | 19.0             | 0.0      | 2.4          | 0.6    | 3.3           |
| Phi-3-mini-128k-instruct               | 2.7       | 9.4              | 0.0      | 2.4          | 0.3    | 2.2           |
| Phi-3.5-MoE-instruct                   | 0.0       | 7.0              | 0.0      | 2.3          | 0.4    | 1.7           |
| Phi-4-mini-instruct                    | 0.0       | 5.5              | 0.0      | 2.3          | 0.5    | 1.5           |
| Mixtral-8x7B-Instruct-v0.1             | 0.0       | 1.6              | 0.0      | 4.0          | 0.3    | 1.3           |
| Phi-3.5-mini-instruct                  | 0.0       | 2.0              | 0.0      | 2.4          | 0.5    | 1.0           |
| Phi-3-medium-128k-instruct             | 0.0       | 0.0              | 0.0      | 2.3          | 0.3    | 0.7           |

Table 5: Average scores per framework and total TALES score.

## B JERICHO WALKTHROUGH SCORES

Table 6 shows the percent of achievable score when using the walkthrough for all JERICHO for 50, 100, 200, 300, 400, 500 and 1000 steps.

| Game                    | 50 Steps | 100 Steps | 200 Steps | 300 Steps | 400 Steps | 500 Steps | 1000 Steps |
|-------------------------|----------|-----------|-----------|-----------|-----------|-----------|------------|
| JerichoEnv905           | 100.000  | 100.000   | 100.000   | 100.000   | 100.000   | 100.000   | 100.000    |
| JerichoEnvAcorncourt    | 100.000  | 100.000   | 100.000   | 100.000   | 100.000   | 100.000   | 100.000    |
| JerichoEnvAdvent        | 26.300   | 42.600    | 63.100    | 100.000   | 100.000   | 100.000   | 100.000    |
| JerichoEnvAdventureland | 21.000   | 42.000    | 100.000   | 100.000   | 100.000   | 100.000   | 100.000    |
| JerichoEnvAfflicted     | 46.700   | 100.000   | 100.000   | 100.000   | 100.000   | 100.000   | 100.000    |
| JerichoEnvAnchor        | 5.000    | 11.000    | 29.000    | 41.000    | 52.000    | 64.000    | 99.000     |
| JerichoEnvAwaken        | 60.000   | 100.000   | 100.000   | 100.000   | 100.000   | 100.000   | 100.000    |
| JerichoEnvBalances      | 58.800   | 58.800    | 98.000    | 98.000    | 98.000    | 98.000    | 98.000     |
| JerichoEnvBallyhoo      | 15.000   | 30.000    | 50.000    | 75.000    | 95.000    | 100.000   | 100.000    |
| JerichoEnvCurses        | 3.800    | 5.600     | 12.700    | 28.200    | 38.200    | 47.500    | 81.800     |
| JerichoEnvCutthroat     | 12.000   | 28.000    | 36.000    | 44.000    | 100.000   | 100.000   | 100.000    |
| JerichoEnvDeephyme      | 20.700   | 28.000    | 60.000    | 76.000    | 100.000   | 100.000   | 100.000    |
| JerichoEnvDetective     | 100.000  | 100.000   | 100.000   | 100.000   | 100.000   | 100.000   | 100.000    |
| JerichoEnvDragon        | 24.000   | 100.000   | 100.000   | 100.000   | 100.000   | 100.000   | 100.000    |
| JerichoEnvEnchanter     | 11.300   | 31.200    | 70.000    | 100.000   | 100.000   | 100.000   | 100.000    |
| JerichoEnvEnter         | 35.000   | 100.000   | 100.000   | 100.000   | 100.000   | 100.000   | 100.000    |
| JerichoEnvGold          | 12.000   | 30.000    | 51.000    | 75.000    | 100.000   | 100.000   | 100.000    |
| JerichoEnvHhgg          | 8.300    | 21.200    | 40.000    | 50.000    | 100.000   | 100.000   | 100.000    |
| JerichoEnvHuntdark      | 0.000    | 100.000   | 100.000   | 100.000   | 100.000   | 100.000   | 100.000    |
| JerichoEnvInfidel       | 12.500   | 20.000    | 70.000    | 100.000   | 100.000   | 100.000   | 100.000    |
| JerichoEnvInhumane      | 33.300   | 77.800    | 100.000   | 100.000   | 100.000   | 100.000   | 100.000    |
| JerichoEnvJewel         | 15.600   | 26.700    | 77.800    | 100.000   | 100.000   | 100.000   | 100.000    |
| JerichoEnvKarn          | 5.900    | 23.500    | 38.200    | 67.600    | 100.000   | 100.000   | 100.000    |
| JerichoEnvLibrary       | 100.000  | 100.000   | 100.000   | 100.000   | 100.000   | 100.000   | 100.000    |
| JerichoEnvLoose         | 100.000  | 100.000   | 100.000   | 100.000   | 100.000   | 100.000   | 100.000    |
| JerichoEnvLostpig       | 28.600   | 42.900    | 85.700    | 85.700    | 85.700    | 85.700    | 85.700     |
| JerichoEnvLudicorp      | 13.300   | 25.300    | 58.700    | 92.700    | 100.000   | 100.000   | 100.000    |
| JerichoEnvLurking       | 10.000   | 25.000    | 55.000    | 100.000   | 100.000   | 100.000   | 100.000    |
| JerichoEnvMoonlit       | 0.000    | 100.000   | 100.000   | 100.000   | 100.000   | 100.000   | 100.000    |
| JerichoEnvMurdac        | 6.800    | 18.000    | 18.000    | 48.000    | 99.600    | 99.600    | 99.600     |
| JerichoEnvNight         | 60.000   | 100.000   | 100.000   | 100.000   | 100.000   | 100.000   | 100.000    |
| JerichoEnvOmniquest     | 40.000   | 100.000   | 100.000   | 100.000   | 100.000   | 100.000   | 100.000    |
| JerichoEnvPartyfoul     | 0.000    | 100.000   | 100.000   | 100.000   | 100.000   | 100.000   | 100.000    |
| JerichoEnvPentari       | 100.000  | 100.000   | 100.000   | 100.000   | 100.000   | 100.000   | 100.000    |
| JerichoEnvPlanetfall    | 7.500    | 26.300    | 35.000    | 60.000    | 100.000   | 100.000   | 100.000    |
| JerichoEnvPlundered     | 16.000   | 44.000    | 100.000   | 100.000   | 100.000   | 100.000   | 100.000    |
| JerichoEnvReverb        | 60.000   | 100.000   | 100.000   | 100.000   | 100.000   | 100.000   | 100.000    |
| JerichoEnvSeastalker    | 28.000   | 44.000    | 90.000    | 100.000   | 100.000   | 100.000   | 100.000    |
| JerichoEnvSherlock      | 23.000   | 37.000    | 55.000    | 84.000    | 100.000   | 100.000   | 100.000    |
| JerichoEnvSnacktime     | 100.000  | 100.000   | 100.000   | 100.000   | 100.000   | 100.000   | 100.000    |
| JerichoEnvSorcerer      | 23.700   | 37.500    | 53.700    | 100.000   | 100.000   | 100.000   | 100.000    |
| JerichoEnvSpellbrkr     | 13.300   | 26.700    | 42.500    | 65.000    | 91.700    | 100.000   | 100.000    |
| JerichoEnvSpirit        | 2.400    | 3.200     | 9.600     | 14.400    | 18.800    | 27.200    | 71.200     |
| JerichoEnvTemple        | 28.600   | 57.100    | 100.000   | 100.000   | 100.000   | 100.000   | 100.000    |
| JerichoEnvTrinity       | 15.000   | 22.000    | 32.000    | 47.000    | 58.000    | 78.000    | 100.000    |
| JerichoEnvTryst205      | 2.900    | 14.300    | 24.300    | 41.400    | 58.600    | 74.300    | 100.000    |
| JerichoEnvWeapon        | 0.000    | 100.000   | 100.000   | 100.000   | 100.000   | 100.000   | 100.000    |
| JerichoEnvWishbringer   | 24.000   | 50.000    | 100.000   | 100.000   | 100.000   | 100.000   | 100.000    |
| JerichoEnvYomomma       | 25.700   | 97.100    | 97.100    | 97.100    | 97.100    | 97.100    | 97.100     |
| JerichoEnvZenon         | 40.000   | 100.000   | 100.000   | 100.000   | 100.000   | 100.000   | 100.000    |
| JerichoEnvZork1         | 18.000   | 29.100    | 41.700    | 77.400    | 100.000   | 100.000   | 100.000    |
| JerichoEnvZork2         | 6.200    | 22.500    | 47.500    | 100.000   | 100.000   | 100.000   | 100.000    |
| JerichoEnvZork3         | 28.600   | 42.900    | 100.000   | 100.000   | 100.000   | 100.000   | 100.000    |
| JerichoEnvZtuu          | 47.000   | 100.000   | 100.000   | 100.000   | 100.000   | 100.000   | 100.000    |

Table 6: Max score percentage reached by following the provided walkthrough for each JERICHO game.

## C ALL AGENT AVERAGE FINAL TOKENS USED PER FRAMEWORK

In Table 7, we include the average final tokens used per game for each framework of all agents.

| Model                                  | TEXTWORLD | TEXTWORLDEXPRESS | ALFWORLD | SCIENCEWORLD | JERICO   |
|----------------------------------------|-----------|------------------|----------|--------------|----------|
| o3 (medium)                            | 41342.0   | 107026.3         | 128740.7 | 92422.7      | 378168.5 |
| o3 (high)                              | 32148.6   | 51361.7          | 68275.0  | 51323.4      | 251760.8 |
| gpt-5 (thinking)                       | 38774.8   | 377563.2         | 145110.7 | 197999.9     | 649059.0 |
| o3 (low)                               | 51609.6   | 84218.5          | 119657.4 | 88557.9      | 318262.7 |
| claude-3.7-sonnet (thinking)           | 69138.9   | 63072.8          | 74516.3  | 128752.7     | 311684.2 |
| claude-3.7-sonnet                      | 72072.9   | 46948.4          | 65131.1  | 152130.6     | 298533.1 |
| claude-3.5-sonnet-latest               | 60766.1   | 68812.7          | 78765.4  | 106749.2     | 291950.3 |
| gpt-4.1                                | 53378.9   | 46454.8          | 54107.6  | 86547.5      | 218123.2 |
| gpt-5-mini (thinking)                  | 151984.2  | 391444.6         | 508585.4 | 318636.6     | 878673.2 |
| o1                                     | 47765.6   | 113492.9         | 127460.2 | 74300.1      | 211958.7 |
| gpt-4o                                 | 106863.0  | 49536.2          | 77946.0  | 107121.9     | 209712.8 |
| claude-3.5-haiku                       | 119839.9  | 85136.1          | 267643.6 | 205751.0     | 269458.9 |
| Llama-3.1-405B-Instruct                | 66476.2   | 52624.6          | 106290.0 | 137657.2     | 226078.6 |
| gemini-2.0-flash                       | 142937.1  | 66075.5          | 138048.3 | 142883.3     | 230182.0 |
| Qwen3-32B                              | 198390.4  | 188065.3         | 190900.1 | 229708.1     | 374514.2 |
| Llama-3.3-70B-Instruct                 | 166373.8  | 70165.0          | 127348.7 | 128860.9     | 205362.8 |
| Llama-3.1-70B-Instruct                 | 133253.4  | 51885.9          | 106925.7 | 144615.6     | 210914.8 |
| Qwen2.5-72B-Instruct                   | 112658.0  | 52096.1          | 97211.2  | 168057.3     | 197628.3 |
| Mistral-Large-Instruct-2407            | 107788.5  | 110228.6         | 118395.4 | 163232.0     | 243256.0 |
| gpt-4.1-mini                           | 184516.3  | 92775.4          | 130758.2 | 125310.5     | 188824.3 |
| gpt-4o-mini                            | 159840.9  | 60210.7          | 145236.3 | 172875.7     | 182620.7 |
| Llama-4-Scout-17B-16E-Instruct         | 289709.8  | 120173.9         | 172633.9 | 222464.1     | 229947.2 |
| gpt-5-nano                             | 770352.7  | 623055.1         | 821024.1 | 730904.7     | 825754.3 |
| Llama-4-Maverick-17B-128E-Instruct-FP8 | 287547.2  | 213139.5         | 354183.9 | 394875.5     | 372902.6 |
| Mistral-Small-Instruct-2409            | 163334.9  | 304510.9         | 107549.3 | 150730.7     | 208261.8 |
| Llama-3.1-8B-Instruct                  | 222239.7  | 358837.4         | 96582.5  | 152293.0     | 165505.8 |
| DeepSeek-R1                            | 393654.5  | 398322.7         | 496328.4 | 431997.9     | 439399.3 |
| Qwen2.5-7B-Instruct                    | 143127.1  | 214926.3         | 91334.4  | 163021.2     | 171107.7 |
| Llama-3.2-3B-Instruct                  | 230950.5  | 79878.3          | 84620.4  | 195397.2     | 152544.7 |
| phi-4                                  | 189031.6  | 100363.9         | 126068.1 | 153395.2     | 178713.4 |
| gpt-4.1-nano                           | 545577.7  | 171767.5         | 277643.8 | 201505.9     | 182678.8 |
| Mistral-Small-24B-Instruct-2501        | 399093.8  | 500484.8         | 479125.0 | 418284.9     | 475649.7 |
| DeepSeek-R1-Distill-Llama-70B          | 453695.7  | 637384.1         | 719404.2 | 482819.3     | 407401.8 |
| Ministral-8B-Instruct-2410             | 220157.9  | 337447.5         | 112710.5 | 108916.4     | 118104.9 |
| Mistral-Small-3.1-24B-Instruct-2503    | 448764.0  | 507986.4         | 477505.8 | 397054.6     | 514733.5 |
| Mixtral-8x22B-Instruct-v0.1            | 158782.2  | 137583.5         | 92832.7  | 134827.6     | 156515.8 |
| Llama-3.2-1B-Instruct                  | 567691.8  | 279214.8         | 457857.3 | 138285.6     | 201648.5 |
| Phi-3-mini-128k-instruct               | 245215.0  | 429993.4         | 257852.2 | 253989.5     | 237881.5 |
| Phi-3.5-MoE-instruct                   | 274848.9  | 295190.9         | 240007.5 | 252055.6     | 271680.0 |
| Phi-4-mini-instruct                    | 231947.3  | 199299.1         | 195407.4 | 190887.4     | 212508.9 |
| Mixtral-8x7B-Instruct-v0.1             | 612791.9  | 555281.3         | 520434.6 | 560994.6     | 564967.6 |
| Phi-3.5-mini-instruct                  | 426125.5  | 476218.4         | 410459.6 | 327584.9     | 457434.4 |
| Phi-3-medium-128k-instruct             | 620235.4  | 585925.5         | 581721.6 | 513787.5     | 595335.5 |

Table 7: Avg final tokens used per LLM per game for each framework. Ordering is based on the agent’s cumulative average score shown in Table 5.

## D AGENT SCORE STANDARD DEVIATIONS

In Table 8, we include the average standard deviation across seeds per framework of all LLM agents.

| Model                                  | TEXTWORLD | TEXTWORLDEXPRESS | ALFWORLD | SCIENCEWORLD | JERICO |
|----------------------------------------|-----------|------------------|----------|--------------|--------|
| o3 (medium)                            | 0.0       | 2.7              | 4.6      | 2.2          | 0.5    |
| o3 (high)                              | 0.0       | 3.2              | 9.1      | 1.1          | 1.3    |
| gpt-5 (thinking)                       | 0.0       | 5.5              | 7.0      | 2.5          | 1.1    |
| o3 (low)                               | 2.0       | 6.9              | 9.5      | 0.8          | 1.1    |
| claude-3.7-sonnet (thinking)           | 2.8       | 4.7              | 10.2     | 2.9          | 0.9    |
| claude-3.7-sonnet                      | 0.0       | 1.4              | 3.7      | 3.7          | 1.1    |
| claude-3.5-sonnet-latest               | 0.0       | 2.9              | 5.9      | 3.4          | 1.0    |
| gpt-4.1                                | 2.6       | 1.9              | 11.8     | 2.3          | 0.8    |
| gpt-5-mini (thinking)                  | 3.6       | 2.8              | 9.5      | 6.1          | 1.4    |
| o1                                     | 1.2       | 4.4              | 4.6      | 5.0          | 1.7    |
| gpt-4o                                 | 6.1       | 0.4              | 14.9     | 2.8          | 0.6    |
| claude-3.5-haiku                       | 5.3       | 0.0              | 3.7      | 2.6          | 0.6    |
| Llama-3.1-405B-Instruct                | 5.0       | 4.9              | 10.9     | 4.5          | 0.5    |
| gemini-2.0-flash                       | 8.6       | 1.3              | 4.6      | 3.4          | 0.4    |
| Qwen3-32B                              | 6.8       | 1.9              | 10.9     | 3.2          | 0.4    |
| Llama-3.3-70B-Instruct                 | 2.8       | 3.4              | 3.7      | 2.3          | 0.1    |
| Llama-3.1-70B-Instruct                 | 3.5       | 1.9              | 5.9      | 4.5          | 0.2    |
| Qwen2.5-72B-Instruct                   | 2.0       | 2.5              | 4.6      | 3.8          | 0.7    |
| Mistral-Large-Instruct-2407            | 8.2       | 2.6              | 3.7      | 8.1          | 0.9    |
| gpt-4.1-mini                           | 6.1       | 1.7              | 7.5      | 3.6          | 0.3    |
| gpt-4o-mini                            | 5.4       | 1.7              | 0.0      | 1.5          | 0.2    |
| Llama-4-Scout-17B-16E-Instruct         | 0.0       | 0.0              | 0.0      | 0.0          | 0.0    |
| gpt-5-nano                             | 7.7       | 5.1              | 3.7      | 4.1          | 0.3    |
| Llama-4-Maverick-17B-128E-Instruct-FP8 | 1.3       | 0.0              | 0.0      | 0.1          | 0.3    |
| Mistral-Small-Instruct-2409            | 5.1       | 0.0              | 0.0      | 2.2          | 0.0    |
| Llama-3.1-8B-Instruct                  | 4.7       | 2.9              | 0.0      | 0.9          | 0.1    |
| DeepSeek-R1                            | 3.9       | 0.0              | 0.0      | 2.2          | 0.1    |
| Qwen2.5-7B-Instruct                    | 0.0       | 0.0              | 0.0      | 0.7          | 0.1    |
| Llama-3.2-3B-Instruct                  | 2.6       | 2.9              | 0.0      | 1.6          | 0.3    |
| phi-4                                  | 0.4       | 0.0              | 0.0      | 1.3          | 0.0    |
| gpt-4.1-nano                           | 2.1       | 4.5              | 0.0      | 1.0          | 2.4    |
| Mistral-Small-24B-Instruct-2501        | 3.1       | 1.0              | 0.0      | 1.1          | 0.3    |
| DeepSeek-R1-Distill-Llama-70B          | 2.8       | 0.3              | 0.0      | 0.4          | 0.1    |
| Ministral-8B-Instruct-2410             | 4.2       | 0.0              | 0.0      | 0.0          | 0.0    |
| Mistral-Small-3.1-24B-Instruct-2503    | 0.0       | 0.0              | 0.0      | 0.3          | 0.0    |
| Mixtral-8x22B-Instruct-v0.1            | 3.0       | 2.3              | 0.0      | 1.7          | 0.1    |
| Llama-3.2-1B-Instruct                  | 0.0       | 0.0              | 0.0      | 0.0          | 0.0    |
| Phi-3-mini-128k-instruct               | 2.0       | 0.0              | 0.0      | 0.3          | 0.0    |
| Phi-3.5-MoE-instruct                   | 0.0       | 2.7              | 0.0      | 0.0          | 0.1    |
| Phi-4-mini-instruct                    | 0.0       | 0.0              | 0.0      | 0.0          | 0.0    |
| Mixtral-8x7B-Instruct-v0.1             | 0.0       | 0.0              | 0.0      | 0.0          | 0.0    |
| Phi-3.5-mini-instruct                  | 0.0       | 1.1              | 0.0      | 0.1          | 0.0    |
| Phi-3-medium-128k-instruct             | 0.0       | 0.0              | 0.0      | 0.0          | 0.0    |

Table 8: Standard deviation statistics for different LLMs Ordering is based on the agent’s cumulative average score shown in Table 5.

## E ALL GAMES

In Table 9 and Table 10 we list all tasks and games in their respective frameworks.

Table 9: Games Organized by Framework. Part 1.

| Jericho          |                |                 |
|------------------|----------------|-----------------|
| 1. 905           | 19. HuntDark   | 37. Reverb      |
| 2. AcornCourt    | 20. Infidel    | 38. Seastalker  |
| 3. Advent        | 21. Inhumane   | 39. Sherlock    |
| 4. Adventureland | 22. Jewel      | 40. Snacktime   |
| 5. Afflicted     | 23. Karn       | 41. Sorcerer    |
| 6. Anchor        | 24. Library    | 42. Spellbrkr   |
| 7. Awaken        | 25. Loose      | 43. Spirit      |
| 8. Balances      | 26. Lostpig    | 44. Temple      |
| 9. Ballyhoo      | 27. Ludicorp   | 45. Theatre     |
| 10. Curses       | 28. Lurking    | 46. Trinity     |
| 11. Cutthroat    | 29. Moonlit    | 47. Tryst205    |
| 12. Deephome     | 30. Murdac     | 48. Weapon      |
| 13. Detective    | 31. Night      | 49. Wishbringer |
| 14. Dragon       | 32. Omniquest  | 50. Yomomma     |
| 15. Enchanter    | 33. Partyfoul  | 51. Zenon       |
| 16. Enter        | 34. Pentari    | 52. Zork1       |
| 17. Gold         | 35. Planetfall | 53. Zork2       |
| 18. Hhgg         | 36. Plundered  | 54. Zork3       |
|                  |                | 55. Ztuu        |

| ScienceWorld                       |                                                 |
|------------------------------------|-------------------------------------------------|
| 1. Boil                            | 16. InclinedPlaneFrictionNamedSurfaces          |
| 2. ChangeTheStateOfMatterOf        | 17. InclinedPlaneFrictionUnnamedSurfaces        |
| 3. ChemistryMix                    | 18. LifespanLongestLived                        |
| 4. ChemistryMixPaintSecondaryColor | 19. LifespanLongestLivedThenShortestLived       |
| 5. ChemistryMixPaintTertiaryColor  | 20. LifespanShortestLived                       |
| 6. FindAnimal                      | 21. MeasureMeltingPointKnownSubstance           |
| 7. FindLivingThing                 | 22. MeasureMeltingPointUnknownSubstance         |
| 8. FindNonLivingThing              | 23. Melt                                        |
| 9. FindPlant                       | 24. MendelianGeneticsKnownPlant                 |
| 10. Freeze                         | 25. MendelianGeneticsUnknownPlant               |
| 11. GrowFruit                      | 26. PowerComponent                              |
| 12. GrowPlant                      | 27. PowerComponentRenewableVsNonrenewableEnergy |
| 13. IdentifyLifeStages1            | 28. TestConductivity                            |
| 14. IdentifyLifeStages2            | 29. TestConductivityOfUnknownSubstances         |
| 15. InclinedPlaneDetermineAngle    | 30. UseThermometer                              |

Table 10: Games Organized by Framework. Part 2.

| <b>ALFWorld</b>                    |                                    |
|------------------------------------|------------------------------------|
| 1. LookAtObjInLightSeen            | 7. PickCoolThenPlaceInRecepSeen    |
| 2. LookAtObjInLightUnseen          | 8. PickCoolThenPlaceInRecepUnseen  |
| 3. PickAndPlaceSimpleSeen          | 9. PickHeatThenPlaceInRecepSeen    |
| 4. PickAndPlaceSimpleUnseen        | 10. PickHeatThenPlaceInRecepUnseen |
| 5. PickCleanThenPlaceInRecepSeen   | 11. PickTwoObjAndPlaceSeen         |
| 6. PickCleanThenPlaceInRecepUnseen | 12. PickTwoObjAndPlaceUnseen       |
| <b>TextWorld</b>                   |                                    |
| 1. CookingLevel1                   | 6. CookingLevel6                   |
| 2. CookingLevel2                   | 7. CookingLevel7                   |
| 3. CookingLevel3                   | 8. CookingLevel8                   |
| 4. CookingLevel4                   | 9. CookingLevel9                   |
| 5. CookingLevel5                   | 10. CookingLevel10                 |
| <b>TWX</b>                         |                                    |
| 1. Arithmetic                      | 9. SimonSaysWithMemory10           |
| 2. CoinCollector                   | 10. SimonSaysWithMemory50          |
| 3. CookingWorld                    | 11. SimonSaysWithMemory100         |
| 4. MapReader                       | 12. SimonSaysWithMemory10Verbose   |
| 5. PeckingOrder                    | 13. SimonSaysWithMemory50Verbose   |
| 6. SimonSays10                     | 14. SimonSaysWithMemory100Verbose  |
| 7. SimonSays50                     | 15. Sorting                        |
| 8. SimonSays100                    | 16. TextWorldCommonsense           |

## F ALL SCORES PER GAME: TEXTWORLD

Table 11 shows the per-game scores of all models in TEXTWORLD across all seeds.

## G ALL SCORES PER GAME: TEXTWORLDEXPRESS

Table 12 shows the average per-game scores of all models in TEXTWORLDEXPRESS across all seeds.

## H ALL SCORES PER GAME: ALFWORLD

Table 13 shows the average per-game scores of all models in ALFWORLD across all seeds.

## I ALL SCORES PER GAME: SCIENCEWORLD

Tables 14 and 15 shows the per-task average scores of all models in SCIENCEWORLD across all seeds.

## J ALL SCORES PER GAME: JERICHO

Tables 16 and 17 shows the per-game scores of all models in JERICHO. \* Indicates LLM has only been run on one seed. We will update the paper once all run seeds have been completed.

Table 11: Model Performance on TEXTWORLD Tasks.

| Models                                 | CookingLevel1 | CookingLevel2 | CookingLevel3 | CookingLevel4 | CookingLevel5 | CookingLevel6 | CookingLevel7 | CookingLevel8 | CookingLevel9 | CookingLevel10 |
|----------------------------------------|---------------|---------------|---------------|---------------|---------------|---------------|---------------|---------------|---------------|----------------|
| o3 (medium)                            | 100.0         | 100.0         | 100.0         | 100.0         | 100.0         | 100.0         | 100.0         | 100.0         | 100.0         | 100.0          |
| o3 (high)                              | 100.0         | 100.0         | 100.0         | 100.0         | 100.0         | 100.0         | 100.0         | 100.0         | 100.0         | 100.0          |
| gpt-5 (thinking)                       | 100.0         | 100.0         | 100.0         | 100.0         | 100.0         | 100.0         | 100.0         | 100.0         | 100.0         | 100.0          |
| o3 (low)                               | 100.0         | 90.9          | 100.0         | 100.0         | 100.0         | 100.0         | 100.0         | 100.0         | 100.0         | 100.0          |
| claude-3.7-sommet (thinking)           | 100.0         | 72.7          | 100.0         | 100.0         | 100.0         | 100.0         | 100.0         | 100.0         | 100.0         | 100.0          |
| claude-3.7-sommet                      | 100.0         | 72.7          | 100.0         | 100.0         | 100.0         | 100.0         | 100.0         | 100.0         | 100.0         | 100.0          |
| claude-3.5-sommet-latest               | 100.0         | 54.5          | 100.0         | 100.0         | 100.0         | 100.0         | 100.0         | 100.0         | 100.0         | 100.0          |
| gpt-4.1                                | 100.0         | 61.8          | 100.0         | 100.0         | 100.0         | 100.0         | 100.0         | 100.0         | 100.0         | 90.9           |
| gpt-5-mini (thinking)                  | 100.0         | 47.3          | 100.0         | 100.0         | 100.0         | 100.0         | 100.0         | 100.0         | 100.0         | 100.0          |
| o1                                     | 100.0         | 78.2          | 100.0         | 100.0         | 100.0         | 100.0         | 100.0         | 100.0         | 100.0         | 100.0          |
| gpt-4o                                 | 86.7          | 14.5          | 70.0          | 100.0         | 86.7          | 100.0         | 100.0         | 100.0         | 100.0         | 78.2           |
| claude-3.5-haiku                       | 100.0         | 58.2          | 100.0         | 100.0         | 100.0         | 100.0         | 100.0         | 100.0         | 100.0         | 90.9           |
| Llama-3.1-405B-Instruct                | 100.0         | 54.5          | 85.0          | 100.0         | 100.0         | 100.0         | 100.0         | 100.0         | 100.0         | 69.1           |
| gemini-2.0-flash                       | 100.0         | 21.8          | 25.0          | 100.0         | 100.0         | 86.7          | 100.0         | 100.0         | 84.0          | 90.9           |
| Qwen3-32B                              | 100.0         | 27.3          | 85.0          | 100.0         | 100.0         | 46.7          | 86.7          | 100.0         | 68.0          | 81.8           |
| Llama-3.3-70B-Instruct                 | 100.0         | 0.0           | 25.0          | 100.0         | 100.0         | 0.0           | 100.0         | 100.0         | 92.0          | 90.9           |
| Llama-3.1-70B-Instruct                 | 100.0         | 0.0           | 25.0          | 100.0         | 100.0         | 0.0           | 100.0         | 100.0         | 84.0          | 47.3           |
| Qwen2.5-72B-Instruct                   | 100.0         | 0.0           | 25.0          | 100.0         | 100.0         | 100.0         | 100.0         | 100.0         | 100.0         | 40.0           |
| Mistral-Large-Instruct-2407            | 86.7          | 32.7          | 100.0         | 100.0         | 86.7          | 100.0         | 100.0         | 100.0         | 100.0         | 18.2           |
| gpt-4.1-mini                           | 60.0          | 5.5           | 70.0          | 100.0         | 46.7          | 86.7          | 100.0         | 40.0          | 76.0          | 36.4           |
| gpt-4o-mini                            | 100.0         | 0.0           | 25.0          | 100.0         | 46.7          | 100.0         | 0.0           | 52.0          | 100.0         | 41.8           |
| Llama-4-Scout-17B-16E-Instruct         | 33.3          | 27.3          | 25.0          | 100.0         | 100.0         | 0.0           | 0.0           | 0.0           | 40.0          | 45.5           |
| gpt-5-nano                             | 60.0          | 12.7          | 85.0          | 100.0         | 33.3          | 0.0           | 0.0           | 60.0          | 20.0          | 45.5           |
| Llama-4-Maverick-17B-128E-Instruct-FP8 | 100.0         | 0.0           | 25.0          | 100.0         | 20.0          | 0.0           | 100.0         | 32.0          | 16.0          | 41.8           |
| Mistral-Small-Instruct-2409            | 100.0         | 0.0           | 25.0          | 100.0         | 100.0         | 20.0          | 0.0           | 100.0         | 76.0          | 40.0           |
| Llama-3.1-8B-Instruct                  | 73.3          | 1.8           | 25.0          | 0.0           | 100.0         | 0.0           | 0.0           | 0.0           | 60.0          | 9.1            |
| DeepSeek-R1                            | 66.7          | 0.0           | 25.0          | 75.0          | 100.0         | 0.0           | 0.0           | 28.0          | 40.0          | 36.4           |
| Qwen2.5-7B-Instruct                    | 33.3          | 18.2          | 25.0          | 100.0         | 0.0           | 0.0           | 0.0           | 100.0         | 0.0           | 0.0            |
| Llama-3.2-3B-Instruct                  | 40.0          | 0.0           | 25.0          | 100.0         | 0.0           | 0.0           | 0.0           | 24.0          | 16.0          | 9.1            |
| phi-4                                  | 0.0           | 0.0           | 0.0           | 0.0           | 33.3          | 33.3          | 0.0           | 40.0          | 100.0         | 1.8            |
| gpt-4.1-nano                           | 33.3          | 0.0           | 25.0          | 0.0           | 0.0           | 0.0           | 13.3          | 56.0          | 0.0           | 0.0            |
| Mistral-Small-24B-Instruct-2501        | 46.7          | 0.0           | 25.0          | 25.0          | 33.3          | 0.0           | 0.0           | 20.0          | 8.0           | 0.0            |
| DeepSeek-R1-Distill-Llama-70B          | 6.7           | 0.0           | 25.0          | 55.0          | 0.0           | 0.0           | 0.0           | 0.0           | 0.0           | 0.0            |
| Mistral-8B-Instruct-2410               | 33.3          | 0.0           | 40.0          | 0.0           | 0.0           | 0.0           | 0.0           | 36.0          | 0.0           | 0.0            |
| Mistral-Small-3.1-24B-Instruct-2503    | 0.0           | 0.0           | 25.0          | 0.0           | 0.0           | 0.0           | 0.0           | 0.0           | 0.0           | 0.0            |
| Mistral-8x22B-Instruct-v0.1            | 6.7           | 0.0           | 0.0           | 100.0         | 0.0           | 0.0           | 0.0           | 64.0          | 0.0           | 0.0            |
| Llama-3.2-1B-Instruct                  | 0.0           | 0.0           | 0.0           | 0.0           | 0.0           | 0.0           | 0.0           | 0.0           | 0.0           | 0.0            |
| Phi-3-mini-128k-instruct               | 0.0           | 0.0           | 10.0          | 5.0           | 0.0           | 0.0           | 0.0           | 12.0          | 0.0           | 0.0            |
| Phi-3.5-MoE-instruct                   | 0.0           | 0.0           | 0.0           | 0.0           | 0.0           | 0.0           | 0.0           | 0.0           | 0.0           | 0.0            |
| Phi-4-mini-instruct                    | 0.0           | 0.0           | 0.0           | 0.0           | 0.0           | 0.0           | 0.0           | 0.0           | 0.0           | 0.0            |
| Mistral-8x7B-Instruct-v0.1             | 0.0           | 0.0           | 0.0           | 0.0           | 0.0           | 0.0           | 0.0           | 0.0           | 0.0           | 0.0            |
| Phi-3.5-mini-instruct                  | 0.0           | 0.0           | 0.0           | 0.0           | 0.0           | 0.0           | 0.0           | 0.0           | 0.0           | 0.0            |
| Phi-3-medium-128k-instruct             | 0.0           | 0.0           | 0.0           | 0.0           | 0.0           | 0.0           | 0.0           | 0.0           | 0.0           | 0.0            |

Table 12: Model Performance on TEXTWORLD EXPRESS tasks.

| Models                                 | Arithmetic | CodeCollector | CookingWorld | MapReader | PackingOrder | SimulSisy-10 | SimulSisy-50 | SimulSisy-100 | SimulSisy-500 | SimulSisy-WithMemory10 | SimulSisy-WithMemory100 | SimulSisy-WithMemory1000 | SimulSisy-WithMemory10000 | SimulSisy-WithMemory50 | SimulSisy-WithMemory500 | Sorting | TextWorldCommaence |
|----------------------------------------|------------|---------------|--------------|-----------|--------------|--------------|--------------|---------------|---------------|------------------------|-------------------------|--------------------------|---------------------------|------------------------|-------------------------|---------|--------------------|
| o3 (medium)                            | 100.0      | 100.0         | 76.8         | 100.0     | 100.0        | 100.0        | 100.0        | 100.0         | 100.0         | 100.0                  | 100.0                   | 100.0                    | 100.0                     | 97.2                   | 100.0                   | 100.0   | 100.0              |
| o3 (low)                               | 80.0       | 100.0         | 55.6         | 100.0     | 100.0        | 100.0        | 100.0        | 100.0         | 100.0         | 100.0                  | 100.0                   | 100.0                    | 100.0                     | 92.2                   | 100.0                   | 100.0   | 100.0              |
| gpt-5 (thinking)                       | 40.0       | 100.0         | 42.0         | 100.0     | 100.0        | 100.0        | 100.0        | 90.2          | 100.0         | 100.0                  | 100.0                   | 100.0                    | 100.0                     | 78.4                   | 60.0                    | 60.0    | 50.0               |
| o3 (low)                               | 90.0       | 100.0         | 42.0         | 100.0     | 100.0        | 100.0        | 100.0        | 100.0         | 100.0         | 100.0                  | 100.0                   | 100.0                    | 100.0                     | 100.0                  | 60.0                    | 60.0    | 80.0               |
| claude-3.7-sonnet (thinking)           | 100.0      | 100.0         | 39.2         | 100.0     | 100.0        | 100.0        | 100.0        | 100.0         | 100.0         | 100.0                  | 100.0                   | 100.0                    | 100.0                     | 100.0                  | 100.0                   | 100.0   | 70.0               |
| claude-3.7-sonnet-latest               | 100.0      | 100.0         | 39.2         | 100.0     | 100.0        | 100.0        | 100.0        | 100.0         | 100.0         | 100.0                  | 100.0                   | 100.0                    | 100.0                     | 100.0                  | 100.0                   | 100.0   | 80.0               |
| gpt-4.1                                | 80.0       | 100.0         | 30.8         | 100.0     | 100.0        | 100.0        | 100.0        | 100.0         | 100.0         | 100.0                  | 100.0                   | 100.0                    | 100.0                     | 100.0                  | 100.0                   | 100.0   | 70.0               |
| gpt-5-mini (thinking)                  | 0.0        | 100.0         | 33.6         | 100.0     | 100.0        | 100.0        | 100.0        | 68.0          | 88.0          | 100.0                  | 100.0                   | 100.0                    | 100.0                     | 32.2                   | 100.0                   | 100.0   | 50.0               |
| o1                                     | 60.0       | 100.0         | 42.0         | 90.0      | 100.0        | 100.0        | 100.0        | 100.0         | 100.0         | 100.0                  | 100.0                   | 100.0                    | 100.0                     | 46.0                   | 100.0                   | 0.0     | 50.0               |
| gpt-4o                                 | 0.0        | 100.0         | 32.0         | 100.0     | 100.0        | 100.0        | 100.0        | 100.0         | 100.0         | 100.0                  | 100.0                   | 100.0                    | 100.0                     | 100.0                  | 100.0                   | 0.0     | 50.0               |
| gpt-5.5-baihu                          | 100.0      | 100.0         | 32.0         | 100.0     | 100.0        | 100.0        | 100.0        | 100.0         | 100.0         | 100.0                  | 100.0                   | 100.0                    | 100.0                     | 100.0                  | 100.0                   | 0.0     | 50.0               |
| Llama-3.5-8B-Instruct                  | 80.0       | 100.0         | 33.6         | 100.0     | 100.0        | 100.0        | 100.0        | 21.0          | 42.0          | 100.0                  | 100.0                   | 100.0                    | 100.0                     | 100.0                  | 100.0                   | 40.0    | 50.0               |
| gemini-2.0-flash                       | 0.0        | 100.0         | 30.8         | 100.0     | 100.0        | 100.0        | 100.0        | 100.0         | 100.0         | 100.0                  | 100.0                   | 100.0                    | 100.0                     | 70.4                   | 100.0                   | 12.0    | 50.0               |
| Qwen3.3-72B-Instruct                   | 20.0       | 100.0         | 28.0         | 80.0      | 100.0        | 100.0        | 100.0        | 100.0         | 100.0         | 100.0                  | 100.0                   | 100.0                    | 100.0                     | 86.4                   | 100.0                   | 0.0     | 50.0               |
| Llama-3.3-70B-Instruct                 | 0.0        | 100.0         | 28.0         | 100.0     | 100.0        | 100.0        | 100.0        | 100.0         | 100.0         | 100.0                  | 100.0                   | 100.0                    | 100.0                     | 100.0                  | 100.0                   | 0.0     | 50.0               |
| Qwen2.5-72B-Instruct                   | 0.0        | 100.0         | 22.4         | 100.0     | 100.0        | 100.0        | 100.0        | 100.0         | 100.0         | 100.0                  | 100.0                   | 100.0                    | 100.0                     | 100.0                  | 100.0                   | 68.0    | 50.0               |
| Mistral-Large-Instruct-2407            | 20.0       | 100.0         | 42.0         | 100.0     | 100.0        | 100.0        | 100.0        | 100.0         | 100.0         | 100.0                  | 100.0                   | 100.0                    | 100.0                     | 19.2                   | 100.0                   | 100.0   | 50.0               |
| gpt-4.1-mini                           | 50.0       | 100.0         | 42.0         | 50.0      | 30.0         | 100.0        | 100.0        | 100.0         | 100.0         | 100.0                  | 100.0                   | 100.0                    | 100.0                     | 100.0                  | 100.0                   | 0.0     | 50.0               |
| gpt-4o-mini                            | 0.0        | 100.0         | 42.0         | 50.0      | 100.0        | 100.0        | 100.0        | 100.0         | 100.0         | 100.0                  | 100.0                   | 100.0                    | 100.0                     | 100.0                  | 100.0                   | 0.0     | 50.0               |
| gpt-5.5-sonnet-17B-16E-Instruct        | 0.0        | 100.0         | 42.0         | 100.0     | 100.0        | 100.0        | 100.0        | 70.0          | 86.8          | 100.0                  | 100.0                   | 100.0                    | 100.0                     | 100.0                  | 100.0                   | 0.0     | 50.0               |
| Llama-4-Maverick-17B-128E-Instruct-FP8 | 0.0        | 100.0         | 0.0          | 100.0     | 60.0         | 100.0        | 100.0        | 55.0          | 100.0         | 100.0                  | 100.0                   | 100.0                    | 100.0                     | 26.0                   | 100.0                   | 0.0     | 30.0               |
| Llama-4-Maverick-17B-128E-Instruct-FP8 | 0.0        | 100.0         | 42.0         | 100.0     | 100.0        | 100.0        | 100.0        | 55.0          | 100.0         | 100.0                  | 100.0                   | 100.0                    | 100.0                     | 26.0                   | 100.0                   | 0.0     | 50.0               |
| Mistral-Small-Instruct-2409            | 0.0        | 100.0         | 28.0         | 0.0       | 0.0          | 100.0        | 100.0        | 21.0          | 42.0          | 100.0                  | 100.0                   | 100.0                    | 100.0                     | 14.0                   | 100.0                   | 0.0     | 50.0               |
| Llama-3.1-8B-Instruct                  | 10.0       | 100.0         | 2.8          | 0.0       | 100.0        | 100.0        | 100.0        | 100.0         | 100.0         | 100.0                  | 100.0                   | 100.0                    | 100.0                     | 2.0                    | 100.0                   | 0.0     | 50.0               |
| Qwen2.5-72B-Instruct                   | 0.0        | 100.0         | 0.0          | 0.0       | 25.0         | 100.0        | 100.0        | 100.0         | 100.0         | 100.0                  | 100.0                   | 100.0                    | 100.0                     | 30.0                   | 100.0                   | 0.0     | 50.0               |
| Llama-3.2-3B-Instruct                  | 0.0        | 80.0          | 14.0         | 0.0       | 85.0         | 0.0          | 40.0         | 8.0           | 33.0          | 100.0                  | 100.0                   | 100.0                    | 100.0                     | 100.0                  | 100.0                   | 0.0     | 0.0                |
| phi-4                                  | 0.0        | 100.0         | 0.0          | 0.0       | 0.0          | 0.0          | 0.0          | 0.0           | 0.0           | 100.0                  | 100.0                   | 100.0                    | 100.0                     | 100.0                  | 100.0                   | 0.0     | 0.0                |
| gpt-4.1-turbo                          | 0.0        | 100.0         | 0.0          | 0.0       | 0.0          | 100.0        | 100.0        | 21.0          | 42.0          | 100.0                  | 100.0                   | 100.0                    | 100.0                     | 100.0                  | 100.0                   | 0.0     | 0.0                |
| gpt-5.5-sonnet-17B-16E-Instruct-2501   | 0.0        | 100.0         | 0.0          | 0.0       | 0.0          | 100.0        | 100.0        | 21.0          | 42.0          | 100.0                  | 100.0                   | 100.0                    | 100.0                     | 100.0                  | 100.0                   | 0.0     | 0.0                |
| DeepSeek-R1-Distill-Llama-70B          | 0.0        | 100.0         | 28.0         | 50.0      | 50.0         | 100.0        | 100.0        | 34.0          | 68.0          | 100.0                  | 100.0                   | 100.0                    | 100.0                     | 4.0                    | 100.0                   | 0.0     | 50.0               |
| Mistral-8B-Instruct-2410               | 0.0        | 0.0           | 0.0          | 0.0       | 0.0          | 100.0        | 100.0        | 100.0         | 100.0         | 100.0                  | 100.0                   | 100.0                    | 100.0                     | 2.0                    | 100.0                   | 0.0     | 0.0                |
| Mistral-Small-3.1-24B-Instruct-2503    | 0.0        | 0.0           | 0.0          | 0.0       | 0.0          | 20.0         | 2.0          | 2.0           | 4.0           | 100.0                  | 100.0                   | 100.0                    | 100.0                     | 4.0                    | 100.0                   | 0.0     | 0.0                |
| Mistral-8x2B-Instruct-v0.1             | 0.0        | 20.0          | 0.0          | 0.0       | 0.0          | 17.0         | 34.0         | 0.0           | 0.0           | 100.0                  | 100.0                   | 100.0                    | 100.0                     | 4.0                    | 100.0                   | 0.0     | 0.0                |
| Phi-3.5-MoE-Instruct                   | 0.0        | 0.0           | 0.0          | 0.0       | 0.0          | 100.0        | 100.0        | 100.0         | 100.0         | 100.0                  | 100.0                   | 100.0                    | 100.0                     | 4.0                    | 100.0                   | 0.0     | 0.0                |
| Phi-3-mini-128k-instruct               | 0.0        | 80.0          | 0.0          | 0.0       | 0.0          | 20.0         | 4.0          | 0.0           | 0.0           | 100.0                  | 100.0                   | 100.0                    | 100.0                     | 0.0                    | 100.0                   | 0.0     | 0.0                |
| Phi-3.5-MoE-instruct                   | 0.0        | 80.0          | 0.0          | 0.0       | 0.0          | 6.0          | 3.2          | 2.0           | 3.2           | 100.0                  | 100.0                   | 100.0                    | 100.0                     | 0.4                    | 100.0                   | 0.0     | 0.0                |
| Phi-4-mini-instruct                    | 0.0        | 0.0           | 0.0          | 0.0       | 25.0         | 0.0          | 21.0         | 42.0          | 0.0           | 100.0                  | 100.0                   | 100.0                    | 100.0                     | 0.0                    | 100.0                   | 0.0     | 0.0                |
| Mistral-8x7B-Instruct-v0.1             | 0.0        | 0.0           | 0.0          | 0.0       | 0.0          | 20.0         | 4.0          | 0.0           | 0.0           | 100.0                  | 100.0                   | 100.0                    | 100.0                     | 0.0                    | 100.0                   | 0.0     | 0.0                |
| Phi-3.5-mini-128k-instruct             | 0.0        | 0.0           | 0.0          | 0.0       | 0.0          | 17.0         | 34.0         | 0.0           | 0.0           | 100.0                  | 100.0                   | 100.0                    | 100.0                     | 0.0                    | 100.0                   | 0.0     | 0.0                |
| Phi-3-medium-128k-instruct             | 0.0        | 0.0           | 0.0          | 0.0       | 0.0          | 0.0          | 0.0          | 0.0           | 0.0           | 100.0                  | 100.0                   | 100.0                    | 100.0                     | 0.0                    | 100.0                   | 0.0     | 0.0                |



Table 13: Model Performance on ALFWORLD tasks.

| Models                                 | LookAtObjInLightSeen | LookAtObjInLightUnseen | PickAndPlaceSimpleSeen | PickAndPlaceSimpleUnseen | PickCleanThenPlaceInReceptSeen | PickCleanThenPlaceInReceptUnseen | PickCoolThenPlaceInReceptSeen | PickCoolThenPlaceInReceptUnseen | PickHeatThenPlaceInReceptSeen | PickHeatThenPlaceInReceptUnseen | PickTwoObjAndPlaceSeen | PickTwoObjAndPlaceUnseen |
|----------------------------------------|----------------------|------------------------|------------------------|--------------------------|--------------------------------|----------------------------------|-------------------------------|---------------------------------|-------------------------------|---------------------------------|------------------------|--------------------------|
| o3 (medium)                            | 100.0                | 100.0                  | 100.0                  | 100.0                    | 60.0                           | 100.0                            | 100.0                         | 100.0                           | 60.0                          | 80.0                            | 80.0                   | 80.0                     |
| o3 (high)                              | 60.0                 | 100.0                  | 100.0                  | 100.0                    | 20.0                           | 60.0                             | 80.0                          | 80.0                            | 80.0                          | 100.0                           | 100.0                  | 100.0                    |
| gpt-5 (thinking)                       | 100.0                | 100.0                  | 100.0                  | 100.0                    | 100.0                          | 100.0                            | 100.0                         | 100.0                           | 100.0                         | 100.0                           | 100.0                  | 100.0                    |
| o3 (low)                               | 80.0                 | 100.0                  | 80.0                   | 100.0                    | 60.0                           | 80.0                             | 20.0                          | 80.0                            | 40.0                          | 100.0                           | 60.0                   | 60.0                     |
| claude-3.7-sonnet (thinking)           | 100.0                | 100.0                  | 100.0                  | 100.0                    | 80.0                           | 100.0                            | 100.0                         | 100.0                           | 60.0                          | 80.0                            | 80.0                   | 80.0                     |
| claude-3.7-sonnet                      | 100.0                | 100.0                  | 100.0                  | 100.0                    | 100.0                          | 100.0                            | 100.0                         | 100.0                           | 100.0                         | 100.0                           | 100.0                  | 100.0                    |
| claude-3.7-sonnet-latest               | 20.0                 | 100.0                  | 100.0                  | 100.0                    | 100.0                          | 100.0                            | 100.0                         | 100.0                           | 60.0                          | 100.0                           | 100.0                  | 100.0                    |
| gpt-4.1                                | 80.0                 | 100.0                  | 100.0                  | 100.0                    | 100.0                          | 80.0                             | 100.0                         | 100.0                           | 40.0                          | 100.0                           | 100.0                  | 100.0                    |
| gpt-5-mini (thinking)                  | 100.0                | 100.0                  | 100.0                  | 100.0                    | 20.0                           | 60.0                             | 80.0                          | 40.0                            | 60.0                          | 100.0                           | 0.0                    | 0.0                      |
| o1                                     | 100.0                | 40.0                   | 40.0                   | 20.0                     | 0.0                            | 40.0                             | 60.0                          | 40.0                            | 0.0                           | 0.0                             | 0.0                    | 0.0                      |
| gpt-4o                                 | 100.0                | 100.0                  | 100.0                  | 100.0                    | 60.0                           | 60.0                             | 60.0                          | 60.0                            | 40.0                          | 60.0                            | 80.0                   | 80.0                     |
| Llama-3.1-405B-Instruct                | 80.0                 | 0.0                    | 100.0                  | 80.0                     | 0.0                            | 0.0                              | 0.0                           | 0.0                             | 20.0                          | 0.0                             | 20.0                   | 20.0                     |
| Llama-3.1-70B-Instruct                 | 100.0                | 0.0                    | 100.0                  | 100.0                    | 100.0                          | 60.0                             | 60.0                          | 60.0                            | 100.0                         | 100.0                           | 80.0                   | 80.0                     |
| Gemma-3.2B                             | 80.0                 | 0.0                    | 100.0                  | 60.0                     | 80.0                           | 60.0                             | 20.0                          | 40.0                            | 20.0                          | 80.0                            | 0.0                    | 0.0                      |
| Llama-3.3-70B-Instruct                 | 100.0                | 20.0                   | 40.0                   | 0.0                      | 0.0                            | 20.0                             | 0.0                           | 0.0                             | 0.0                           | 0.0                             | 0.0                    | 0.0                      |
| Qwen2.5-72B-Instruct                   | 100.0                | 0.0                    | 60.0                   | 0.0                      | 0.0                            | 0.0                              | 0.0                           | 0.0                             | 0.0                           | 0.0                             | 0.0                    | 0.0                      |
| Mistral-Large-Instruct-2407            | 100.0                | 0.0                    | 100.0                  | 100.0                    | 0.0                            | 80.0                             | 0.0                           | 0.0                             | 0.0                           | 0.0                             | 60.0                   | 0.0                      |
| gpt-4.1-mini                           | 0.0                  | 0.0                    | 0.0                    | 40.0                     | 0.0                            | 0.0                              | 0.0                           | 0.0                             | 0.0                           | 0.0                             | 0.0                    | 0.0                      |
| gpt-4o-mini                            | 0.0                  | 0.0                    | 0.0                    | 20.0                     | 0.0                            | 0.0                              | 0.0                           | 0.0                             | 0.0                           | 0.0                             | 0.0                    | 0.0                      |
| Llama-4-Scout-17B-16E-Instruct         | 0.0                  | 0.0                    | 0.0                    | 20.0                     | 0.0                            | 0.0                              | 0.0                           | 0.0                             | 0.0                           | 0.0                             | 0.0                    | 0.0                      |
| Llama-4-Maverick-17B-128E-Instruct-EP8 | 0.0                  | 0.0                    | 0.0                    | 0.0                      | 0.0                            | 0.0                              | 0.0                           | 0.0                             | 0.0                           | 0.0                             | 0.0                    | 0.0                      |
| Mistral-Small-Instruct-2409            | 0.0                  | 0.0                    | 0.0                    | 0.0                      | 0.0                            | 0.0                              | 0.0                           | 0.0                             | 0.0                           | 0.0                             | 0.0                    | 0.0                      |
| Llama-3.1-8B-Instruct                  | 0.0                  | 0.0                    | 0.0                    | 0.0                      | 0.0                            | 0.0                              | 0.0                           | 0.0                             | 0.0                           | 0.0                             | 0.0                    | 0.0                      |
| DeepSeek-R1                            | 0.0                  | 0.0                    | 0.0                    | 0.0                      | 0.0                            | 0.0                              | 0.0                           | 0.0                             | 0.0                           | 0.0                             | 0.0                    | 0.0                      |
| Qwen2.5-7B-Instruct                    | 0.0                  | 0.0                    | 0.0                    | 0.0                      | 0.0                            | 0.0                              | 0.0                           | 0.0                             | 0.0                           | 0.0                             | 0.0                    | 0.0                      |
| Llama-3.2-3B-Instruct                  | 0.0                  | 0.0                    | 0.0                    | 0.0                      | 0.0                            | 0.0                              | 0.0                           | 0.0                             | 0.0                           | 0.0                             | 0.0                    | 0.0                      |
| gpt-4.1-nano                           | 0.0                  | 0.0                    | 0.0                    | 0.0                      | 0.0                            | 0.0                              | 0.0                           | 0.0                             | 0.0                           | 0.0                             | 0.0                    | 0.0                      |
| Mistral-Small-24B-Instruct-2501        | 0.0                  | 0.0                    | 0.0                    | 0.0                      | 0.0                            | 0.0                              | 0.0                           | 0.0                             | 0.0                           | 0.0                             | 0.0                    | 0.0                      |
| DeepSeek-R1-Distill-Llama-70B          | 0.0                  | 0.0                    | 0.0                    | 0.0                      | 0.0                            | 0.0                              | 0.0                           | 0.0                             | 0.0                           | 0.0                             | 0.0                    | 0.0                      |
| Mistral-8B-Instruct-2410               | 0.0                  | 0.0                    | 0.0                    | 0.0                      | 0.0                            | 0.0                              | 0.0                           | 0.0                             | 0.0                           | 0.0                             | 0.0                    | 0.0                      |
| Mistral-Small-3.1-24B-Instruct-2503    | 0.0                  | 0.0                    | 0.0                    | 0.0                      | 0.0                            | 0.0                              | 0.0                           | 0.0                             | 0.0                           | 0.0                             | 0.0                    | 0.0                      |
| Mistral-8x22B-Instruct-v0.1            | 0.0                  | 0.0                    | 0.0                    | 0.0                      | 0.0                            | 0.0                              | 0.0                           | 0.0                             | 0.0                           | 0.0                             | 0.0                    | 0.0                      |
| Llama-3.2-1B-Instruct                  | 0.0                  | 0.0                    | 0.0                    | 0.0                      | 0.0                            | 0.0                              | 0.0                           | 0.0                             | 0.0                           | 0.0                             | 0.0                    | 0.0                      |
| Phi-3.5-MoE-Instruct                   | 0.0                  | 0.0                    | 0.0                    | 0.0                      | 0.0                            | 0.0                              | 0.0                           | 0.0                             | 0.0                           | 0.0                             | 0.0                    | 0.0                      |
| Phi-3.5-MoE-instruct                   | 0.0                  | 0.0                    | 0.0                    | 0.0                      | 0.0                            | 0.0                              | 0.0                           | 0.0                             | 0.0                           | 0.0                             | 0.0                    | 0.0                      |
| Phi-4-mini-instruct                    | 0.0                  | 0.0                    | 0.0                    | 0.0                      | 0.0                            | 0.0                              | 0.0                           | 0.0                             | 0.0                           | 0.0                             | 0.0                    | 0.0                      |
| Mistral-8x7B-Instruct-v0.1             | 0.0                  | 0.0                    | 0.0                    | 0.0                      | 0.0                            | 0.0                              | 0.0                           | 0.0                             | 0.0                           | 0.0                             | 0.0                    | 0.0                      |
| Phi-3.5-mini-instruct                  | 0.0                  | 0.0                    | 0.0                    | 0.0                      | 0.0                            | 0.0                              | 0.0                           | 0.0                             | 0.0                           | 0.0                             | 0.0                    | 0.0                      |
| Phi-3-medium-128k-instruct             | 0.0                  | 0.0                    | 0.0                    | 0.0                      | 0.0                            | 0.0                              | 0.0                           | 0.0                             | 0.0                           | 0.0                             | 0.0                    | 0.0                      |

Table 14: Model Performance on SCIENCEWORLD tasks. Part 1

| Models                                  | Boil | ChangeTheStateOfMatterOf | ChemistryMix | ChemistryMixPaintSecondaryColor | ChemistryMixPaintTertiaryColor | FindAnimal | FindLivingThing | FindNonLivingThing | FindPlant | Freeze | CrowFruit | CrowPlant | IdentifyLifeStages1 | IdentifyLifeStages2 | InclinedPlaneDetermineAngle |
|-----------------------------------------|------|--------------------------|--------------|---------------------------------|--------------------------------|------------|-----------------|--------------------|-----------|--------|-----------|-----------|---------------------|---------------------|-----------------------------|
| o3 (medium)                             | 48.4 | 100.0                    | 100.0        | 100.0                           | 100.0                          | 85.0       | 100.0           | 100.0              | 100.0     | 48.0   | 100.0     | 85.2      | 89.0                | 100.0               | 100.0                       |
| o3 (high)                               | 68.0 | 100.0                    | 100.0        | 100.0                           | 100.0                          | 88.2       | 100.0           | 100.0              | 100.0     | 49.0   | 87.4      | 92.2      | 78.0                | 100.0               | 100.0                       |
| gpt-5 (thinking)                        | 95.6 | 100.0                    | 100.0        | 100.0                           | 100.0                          | 88.2       | 100.0           | 100.0              | 100.0     | 53.0   | 44.4      | 77.4      | 65.4                | 100.0               | 100.0                       |
| o3 (low)                                | 5.8  | 100.0                    | 100.0        | 100.0                           | 82.0                           | 95.0       | 100.0           | 100.0              | 100.0     | 53.0   | 45.2      | 77.0      | 57.6                | 100.0               | 100.0                       |
| claude-3.7-sonnet (thinking)            | 5.8  | 70.0                     | 88.4         | 100.0                           | 94.0                           | 85.0       | 100.0           | 100.0              | 100.0     | 37.4   | 75.0      | 48.4      | 50.4                | 54.6                | 90.0                        |
| claude-3.7-sonnet                       | 5.8  | 43.2                     | 100.0        | 100.0                           | 76.0                           | 66.6       | 100.0           | 100.0              | 100.0     | 45.0   | 40.4      | 100.0     | 95.0                | 64.6                | 100.0                       |
| claude-3.5-sonnet-latest                | 5.0  | 89.4                     | 100.0        | 100.0                           | 100.0                          | 100.0      | 80.0            | 70.0               | 100.0     | 50.0   | 37.8      | 65.4      | 91.6                | 100.0               | 100.0                       |
| gpt-4.1                                 | 5.0  | 80.0                     | 100.0        | 84.0                            | 60.0                           | 45.0       | 100.0           | 100.0              | 100.0     | 21.2   | 48.8      | 62.6      | 78.0                | 45.2                | 100.0                       |
| gpt-5-mini (thinking)                   | 52.4 | 43.2                     | 100.0        | 100.0                           | 52.2                           | 65.0       | 100.0           | 81.6               | 100.0     | 48.0   | 72.4      | 78.2      | 71.2                | 70.6                | 100.0                       |
| o1                                      | 21.4 | 80.8                     | 100.0        | 100.0                           | 82.2                           | 91.6       | 96.6            | 100.0              | 100.0     | 37.4   | 29.8      | 62.4      | 35.0                | 28.4                | 100.0                       |
| gpt-4o                                  | 2.8  | 2.6                      | 75.0         | 28.0                            | 22.0                           | 100.0      | 90.0            | 100.0              | 100.0     | 0.0    | 27.0      | 11.4      | 20.0                | 64.8                | 82.0                        |
| claude-3.5-haiku                        | 40.0 | 72.8                     | 33.0         | 86.0                            | 76.6                           | 58.2       | 100.0           | 100.0              | 100.0     | 0.0    | 18.4      | 34.0      | 40.4                | 46.8                | 100.0                       |
| Llama-3.1-405B-Instruct                 | 3.2  | 2.2                      | 42.0         | 86.0                            | 20.0                           | 45.0       | 50.0            | 100.0              | 100.0     | 17.6   | 21.0      | 11.6      | 12.0                | 20.0                | 100.0                       |
| gemini-2.0-flash                        | 6.6  | 80.8                     | 42.0         | 60.0                            | 9.4                            | 25.0       | 50.0            | 100.0              | 100.0     | 40.0   | 26.4      | 100.0     | 45.6                | 48.6                | 100.0                       |
| Owen3-32B                               | 5.0  | 16.6                     | 88.4         | 48.0                            | 45.4                           | 25.0       | 70.0            | 40.0               | 25.0      | 2.0    | 34.6      | 13.0      | 19.4                | 37.8                | 100.0                       |
| Llama-3.3-70B-Instruct                  | 9.2  | 1.8                      | 75.0         | 62.0                            | 53.4                           | 50.0       | 70.0            | 100.0              | 100.0     | 0.0    | 41.2      | 10.8      | 65.0                | 35.0                | 100.0                       |
| Llama-3.1-70B-Instruct                  | 1.6  | 2.0                      | 33.0         | 74.0                            | 70.8                           | 25.0       | 85.0            | 100.0              | 100.0     | 0.0    | 23.4      | 9.0       | 50.0                | 20.0                | 100.0                       |
| Owen2.5-72B-Instruct                    | 0.0  | 0.0                      | 8.0          | 100.0                           | 10.0                           | 36.6       | 5.0             | 100.0              | 70.0      | 0.0    | 13.2      | 6.0       | 20.0                | 20.0                | 60.0                        |
| Mistral-Large-Instruct-2407             | 2.4  | 16.6                     | 73.2         | 90.0                            | 64.6                           | 40.0       | 70.0            | 85.0               | 55.0      | 0.0    | 30.2      | 10.0      | 5.6                 | 20.0                | 56.0                        |
| gpt-4o-mini                             | 2.2  | 16.4                     | 48.2         | 48.0                            | 42.0                           | 100.0      | 35.0            | 100.0              | 25.0      | 9.6    | 35.4      | 23.6      | 22.0                | 47.8                | 74.0                        |
| gpt-4o-mini                             | 0.8  | 0.8                      | 29.8         | 28.0                            | 16.8                           | 0.0        | 0.0             | 63.4               | 10.0      | 0.0    | 20.8      | 6.6       | 4.0                 | 28.4                | 5.0                         |
| Llama-4-Scout-17B-16E-Instruct          | 0.0  | 0.0                      | 33.0         | 20.0                            | 7.0                            | 25.0       | 25.0            | 83.0               | 0.0       | 0.0    | 12.0      | 7.0       | 4.0                 | 20.0                | 5.0                         |
| Llama-4-Scout-17B-16E-Instruct          | 1.8  | 0.8                      | 33.0         | 88.0                            | 60.0                           | 23.4       | 21.8            | 78.2               | 21.8      | 0.0    | 32.0      | 7.0       | 15.4                | 30.2                | 13.0                        |
| Llama-4-Maverick-17B-128E-Instruct-FP8  | 0.0  | 0.0                      | 33.0         | 88.0                            | 7.0                            | 23.4       | 21.8            | 8.0                | 0.0       | 0.0    | 21.0      | 7.0       | 0.0                 | 8.0                 | 10.0                        |
| Llama-4-Maverick-17B-128E-Instruct-2409 | 0.0  | 0.4                      | 43.2         | 72.0                            | 8.8                            | 25.0       | 25.0            | 95.0               | 36.6      | 0.0    | 13.4      | 7.6       | 0.0                 | 9.6                 | 0.0                         |
| Mistral-Small-Instruct-2409             | 0.4  | 0.0                      | 8.0          | 24.0                            | 19.6                           | 20.0       | 18.4            | 48.2               | 10.0      | 0.0    | 29.2      | 7.4       | 4.0                 | 14.4                | 3.0                         |
| DeepSeek-R1                             | 0.0  | 0.0                      | 33.0         | 20.0                            | 8.8                            | 10.2       | 21.8            | 53.4               | 23.4      | 0.0    | 12.0      | 7.0       | 0.0                 | 8.0                 | 5.0                         |
| Owen2.5-7B-Instruct                     | 0.0  | 0.0                      | 29.8         | 22.0                            | 8.8                            | 1.6        | 4.8             | 0.0                | 25.0      | 0.0    | 11.0      | 6.0       | 0.0                 | 0.0                 | 0.0                         |
| Llama-3.2-8B-Instruct                   | 0.0  | 0.0                      | 23.2         | 0.0                             | 7.0                            | 13.6       | 10.0            | 0.0                | 0.0       | 0.0    | 82.4      | 7.0       | 4.0                 | 20.0                | 5.0                         |
| phi-4                                   | 0.0  | 0.0                      | 8.0          | 52.0                            | 17.4                           | 10.0       | 0.0             | 0.0                | 3.4       | 0.0    | 12.0      | 6.0       | 4.0                 | 0.0                 | 5.0                         |
| gpt-4.1-nano                            | 0.0  | 0.0                      | 28.0         | 20.0                            | 7.6                            | 10.2       | 10.0            | 0.0                | 3.4       | 0.0    | 13.0      | 6.0       | 2.4                 | 0.0                 | 5.0                         |
| Mistral-Small-24B-Instruct-2501         | 0.0  | 0.0                      | 33.0         | 20.0                            | 7.0                            | 17.0       | 15.2            | 15.2               | 3.4       | 0.0    | 13.0      | 6.4       | 2.4                 | 14.4                | 3.0                         |
| DeepSeek-R1-Distill-Llama-70B           | 0.0  | 0.0                      | 8.0          | 22.0                            | 8.2                            | 10.2       | 13.6            | 10.2               | 8.4       | 0.0    | 12.0      | 6.0       | 0.8                 | 8.0                 | 5.0                         |
| Mistral-8B-Instruct-2410                | 0.0  | 0.0                      | 8.0          | 20.0                            | 7.0                            | 0.0        | 0.0             | 0.0                | 0.0       | 0.0    | 11.0      | 7.0       | 0.0                 | 0.0                 | 0.0                         |
| Mistral-Small-3.1-24B-Instruct-2503     | 0.0  | 0.0                      | 8.0          | 20.0                            | 7.0                            | 0.0        | 0.0             | 0.0                | 0.0       | 0.0    | 11.0      | 6.0       | 0.0                 | 8.0                 | 0.0                         |
| Mistral-8x22B-Instruct-v0.1             | 0.0  | 0.0                      | 11.4         | 36.0                            | 10.0                           | 10.0       | 0.0             | 0.0                | 15.0      | 0.0    | 11.0      | 6.0       | 0.0                 | 6.4                 | 0.0                         |
| Llama-3.2-1B-Instruct                   | 0.0  | 0.0                      | 8.0          | 20.0                            | 7.0                            | 0.0        | 0.0             | 0.0                | 0.0       | 0.0    | 12.0      | 6.8       | 0.0                 | 0.0                 | 0.0                         |
| Phi-3-mini-128k-instruct                | 0.0  | 0.0                      | 8.0          | 20.0                            | 7.0                            | 0.0        | 0.0             | 0.0                | 0.0       | 0.0    | 11.0      | 6.0       | 0.0                 | 0.0                 | 0.0                         |
| Phi-3-MoE-instruct                      | 0.0  | 0.0                      | 8.0          | 20.0                            | 7.0                            | 0.0        | 0.0             | 0.0                | 0.0       | 0.0    | 11.0      | 6.0       | 0.0                 | 0.0                 | 0.0                         |
| Phi-4-mini-instruct                     | 0.0  | 0.0                      | 8.0          | 20.0                            | 7.0                            | 0.0        | 0.0             | 0.0                | 0.0       | 0.0    | 11.0      | 6.0       | 0.0                 | 0.0                 | 0.0                         |
| Mistral-8x7B-Instruct-v0.1              | 0.0  | 0.0                      | 8.0          | 20.0                            | 7.0                            | 0.0        | 0.0             | 0.0                | 0.0       | 0.0    | 11.0      | 6.0       | 0.0                 | 0.0                 | 0.0                         |
| Phi-3.5-mini-instruct                   | 0.0  | 0.0                      | 8.0          | 20.0                            | 1.6                            | 0.0        | 0.0             | 0.0                | 0.0       | 0.0    | 11.0      | 6.0       | 0.0                 | 0.0                 | 0.0                         |
| Phi-3-medium-128k-instruct              | 0.0  | 0.0                      | 8.0          | 20.0                            | 7.0                            | 0.0        | 0.0             | 0.0                | 0.0       | 0.0    | 11.0      | 6.0       | 0.0                 | 0.0                 | 0.0                         |

Table 15: Model Performance on SCIENCEWORLD tasks. Part 2.

| Models                                 | Included@Panel-PredictedNamedSurfaces | Included@Panel-PredictedUnknownSurfaces | Lifespan:LongerLived | Lifespan:LongerLived | Lifespan:ShorterLived | MeasureMatingPoint:KnownSubstance | MeasureMatingPoint:UnknownSubstance | Melt  | MolecularGenetics:KnownPlant | MolecularGenetics:UnknownPlant | PowerComponent | PowerComponent:RenewableVsNonrenewableEnergy | TestConductivity | TestConductivity:OfUnknownSubstances | UseThermometer |
|----------------------------------------|---------------------------------------|-----------------------------------------|----------------------|----------------------|-----------------------|-----------------------------------|-------------------------------------|-------|------------------------------|--------------------------------|----------------|----------------------------------------------|------------------|--------------------------------------|----------------|
| o3 (medium)                            | 100.0                                 | 100.0                                   | 100.0                | 100.0                | 100.0                 | 100.0                             | 100.0                               | 100.0 | 100.0                        | 100.0                          | 81.6           | 53.0                                         | 100.0            | 100.0                                | 100.0          |
| gpt-5 (thinking)                       | 100.0                                 | 100.0                                   | 100.0                | 100.0                | 100.0                 | 100.0                             | 100.0                               | 100.0 | 100.0                        | 100.0                          | 77.0           | 53.0                                         | 100.0            | 100.0                                | 100.0          |
| claude-3.7-sonnet (thinking)           | 100.0                                 | 100.0                                   | 100.0                | 100.0                | 100.0                 | 100.0                             | 100.0                               | 100.0 | 100.0                        | 100.0                          | 77.0           | 52.0                                         | 100.0            | 100.0                                | 100.0          |
| claude-3.7-sonnet                      | 100.0                                 | 100.0                                   | 100.0                | 100.0                | 100.0                 | 81.4                              | 77.4                                | 76.0  | 83.4                         | 51.0                           | 82.2           | 33.2                                         | 70.6             | 100.0                                | 100.0          |
| claude-3.5-sonnet-latest               | 100.0                                 | 100.0                                   | 100.0                | 100.0                | 100.0                 | 76.0                              | 80.6                                | 62.0  | 19.0                         | 14.6                           | 71.6           | 71.8                                         | 64.4             | 37.0                                 | 100.0          |
| gpt-4.1                                | 100.0                                 | 100.0                                   | 100.0                | 100.0                | 100.0                 | 100.0                             | 100.0                               | 100.0 | 100.0                        | 50.6                           | 71.4           | 45.0                                         | 100.0            | 57.2                                 | 100.0          |
| gpt-5-mini (thinking)                  | 100.0                                 | 100.0                                   | 100.0                | 100.0                | 100.0                 | 100.0                             | 95.4                                | 43.4  | 100.0                        | 100.0                          | 90.8           | 71.8                                         | 100.0            | 100.0                                | 100.0          |
| o1                                     | 100.0                                 | 100.0                                   | 100.0                | 100.0                | 100.0                 | 100.0                             | 100.0                               | 100.0 | 60.4                         | 82.0                           | 69.0           | 38.6                                         | 100.0            | 100.0                                | 100.0          |
| claude-3.5-haiku                       | 100.0                                 | 100.0                                   | 100.0                | 100.0                | 100.0                 | 78.4                              | 89.2                                | 59.6  | 47.8                         | 13.6                           | 57.0           | 38.0                                         | 100.0            | 61.8                                 | 100.0          |
| Llama-3.1-405B-Instruct                | 100.0                                 | 100.0                                   | 100.0                | 100.0                | 100.0                 | 90.0                              | 9.0                                 | 4.0   | 83.2                         | 100.0                          | 33.0           | 28.8                                         | 17.0             | 58.8                                 | 37.6           |
| gpt-5-mini                             | 100.0                                 | 100.0                                   | 100.0                | 100.0                | 100.0                 | 100.0                             | 9.0                                 | 4.0   | 83.2                         | 100.0                          | 33.0           | 28.8                                         | 17.0             | 58.8                                 | 37.6           |
| Qwen3-72B                              | 100.0                                 | 100.0                                   | 100.0                | 100.0                | 100.0                 | 81.8                              | 90.6                                | 22.0  | 100.0                        | 100.0                          | 27.0           | 11.6                                         | 8.0              | 58.0                                 | 42.8           |
| Llama-3.3-70B-Instruct                 | 100.0                                 | 100.0                                   | 100.0                | 100.0                | 100.0                 | 81.6                              | 7.4                                 | 4.4   | 100.0                        | 100.0                          | 27.0           | 31.8                                         | 25.0             | 10.0                                 | 68.2           |
| Llama-3.1-70B-Instruct                 | 80.0                                  | 60.0                                    | 100.0                | 100.0                | 100.0                 | 62.6                              | 34.6                                | 2.6   | 100.0                        | 65.2                           | 47.0           | 3.0                                          | 8.6              | 12.8                                 | 38.4           |
| Qwen3-30B                              | 100.0                                 | 100.0                                   | 100.0                | 100.0                | 100.0                 | 100.0                             | 100.0                               | 100.0 | 65.2                         | 31.0                           | 21.0           | 5.0                                          | 65.8             | 64.4                                 | 28.6           |
| Mistral-Large-Instruct-2407            | 4.0                                   | 70.0                                    | 100.0                | 100.0                | 100.0                 | 100.0                             | 10.0                                | 2.6   | 65.2                         | 64.8                           | 23.6           | 10.0                                         | 15.4             | 48.0                                 | 45.8           |
| gpt-4.1-mini                           | 35.0                                  | 18.0                                    | 70.0                 | 100.0                | 90.0                  | 28.0                              | 70.4                                | 2.6   | 64.8                         | 64.8                           | 23.6           | 10.0                                         | 15.4             | 48.0                                 | 45.8           |
| gpt-5-mini                             | 35.0                                  | 18.0                                    | 70.0                 | 100.0                | 90.0                  | 28.0                              | 70.4                                | 2.6   | 64.8                         | 64.8                           | 23.6           | 10.0                                         | 15.4             | 48.0                                 | 45.8           |
| Llama-4-Maverick-17B-128E-Instruct-PPH | 0.0                                   | 0.0                                     | 0.0                  | 0.0                  | 0.0                   | 0.0                               | 0.0                                 | 0.0   | 0.0                          | 0.0                            | 0.0            | 0.0                                          | 0.0              | 0.0                                  | 0.0            |
| gpt-5-nano                             | 3.0                                   | 5.0                                     | 90.0                 | 53.0                 | 33.0                  | 50.0                              | 31.0                                | 1.2   | 0.0                          | 0.0                            | 58.2           | 31.4                                         | 81.0             | 8.0                                  | 18.2           |
| Llama-3.1-8B-Instruct                  | 0.0                                   | 43.0                                    | 40.0                 | 0.0                  | 50.0                  | 6.0                               | 1.0                                 | 1.0   | 0.0                          | 0.0                            | 7.0            | 38.0                                         | 5.0              | 10.0                                 | 0.0            |
| DeepSeek-R1                            | 0.0                                   | 0.0                                     | 0.0                  | 0.0                  | 0.0                   | 4.0                               | 0.0                                 | 0.0   | 2.6                          | 100.0                          | 7.0            | 5.0                                          | 5.0              | 0.0                                  | 9.2            |
| gpt-5-nano                             | 0.0                                   | 0.0                                     | 0.0                  | 0.0                  | 0.0                   | 0.0                               | 0.0                                 | 0.0   | 0.0                          | 0.0                            | 0.0            | 0.0                                          | 0.0              | 0.0                                  | 0.0            |
| Llama-3.2-3B-Instruct                  | 0.0                                   | 0.0                                     | 0.0                  | 0.0                  | 0.0                   | 0.0                               | 0.0                                 | 0.0   | 0.0                          | 0.0                            | 0.0            | 0.0                                          | 0.0              | 0.0                                  | 0.0            |
| phi-4                                  | 0.0                                   | 0.0                                     | 0.0                  | 0.0                  | 0.0                   | 0.0                               | 0.0                                 | 0.0   | 0.0                          | 0.0                            | 0.0            | 0.0                                          | 0.0              | 0.0                                  | 0.0            |
| gpt-4.1-nano                           | 0.0                                   | 0.0                                     | 0.0                  | 0.0                  | 0.0                   | 0.0                               | 0.0                                 | 0.0   | 0.0                          | 0.0                            | 0.0            | 0.0                                          | 0.0              | 0.0                                  | 0.0            |
| DeepSeek-R1-Distill-Llama-70B          | 0.0                                   | 0.0                                     | 0.0                  | 0.0                  | 0.0                   | 0.0                               | 0.0                                 | 0.0   | 0.0                          | 0.0                            | 0.0            | 0.0                                          | 0.0              | 0.0                                  | 0.0            |
| Ministral-8B-Instruct-2410             | 0.0                                   | 0.0                                     | 0.0                  | 0.0                  | 0.0                   | 0.0                               | 0.0                                 | 0.0   | 0.0                          | 0.0                            | 0.0            | 0.0                                          | 0.0              | 0.0                                  | 0.0            |
| Mistral-Small-1.1-24B-Instruct-2503    | 0.0                                   | 0.0                                     | 0.0                  | 0.0                  | 0.0                   | 0.0                               | 0.0                                 | 0.0   | 0.0                          | 0.0                            | 0.0            | 0.0                                          | 0.0              | 0.0                                  | 0.0            |
| Nemotron-4-Base-Instruct-v0.1          | 0.0                                   | 0.0                                     | 0.0                  | 0.0                  | 0.0                   | 0.0                               | 0.0                                 | 0.0   | 0.0                          | 0.0                            | 0.0            | 0.0                                          | 0.0              | 0.0                                  | 0.0            |
| Llama-3.2-1B-Instruct                  | 0.0                                   | 0.0                                     | 0.0                  | 0.0                  | 0.0                   | 0.0                               | 0.0                                 | 0.0   | 0.0                          | 0.0                            | 0.0            | 0.0                                          | 0.0              | 0.0                                  | 0.0            |
| Phi-3-mini-128k-instruct               | 0.0                                   | 0.0                                     | 0.0                  | 0.0                  | 0.0                   | 0.0                               | 0.0                                 | 0.0   | 0.0                          | 0.0                            | 0.0            | 0.0                                          | 0.0              | 0.0                                  | 0.0            |
| Phi-3-mini-3.5B-instruct               | 0.0                                   | 0.0                                     | 0.0                  | 0.0                  | 0.0                   | 0.0                               | 0.0                                 | 0.0   | 0.0                          | 0.0                            | 0.0            | 0.0                                          | 0.0              | 0.0                                  | 0.0            |
| Phi-3-mini-instruct                    | 0.0                                   | 0.0                                     | 0.0                  | 0.0                  | 0.0                   | 0.0                               | 0.0                                 | 0.0   | 0.0                          | 0.0                            | 0.0            | 0.0                                          | 0.0              | 0.0                                  | 0.0            |
| Mistral-8x7B-Instruct-v0.1             | 0.0                                   | 0.0                                     | 0.0                  | 0.0                  | 0.0                   | 0.0                               | 0.0                                 | 0.0   | 0.0                          | 0.0                            | 0.0            | 0.0                                          | 0.0              | 0.0                                  | 0.0            |
| Phi-3.5-mini-instruct                  | 0.0                                   | 0.0                                     | 0.0                  | 0.0                  | 0.0                   | 0.0                               | 0.0                                 | 0.0   | 0.0                          | 0.0                            | 0.0            | 0.0                                          | 0.0              | 0.0                                  | 0.0            |
| Phi-3-medium-128k-instruct             | 0.0                                   | 0.0                                     | 0.0                  | 0.0                  | 0.0                   | 0.0                               | 0.0                                 | 0.0   | 0.0                          | 0.0                            | 0.0            | 0.0                                          | 0.0              | 0.0                                  | 0.0            |

Table 16: Model Performance on JERICHO games(tasks), part 1.

| Models                                 | 905   | Acorncount | Advent | Adventureland | Afflicted | Anchor | Awaken | Balances | Ballyhoo | Curves | Cutthroat | Deepphone | Detective | Dragon | Enchanter | Enter | Gold | Hbagg | Humbledark | Infidel | Inhumane | Jewel | Karn | Library | Loose | Loospg | Ludicorp |
|----------------------------------------|-------|------------|--------|---------------|-----------|--------|--------|----------|----------|--------|-----------|-----------|-----------|--------|-----------|-------|------|-------|------------|---------|----------|-------|------|---------|-------|--------|----------|
| o3 (medium)                            | 100.0 | 100.0      | 20.6   | 11.2          | 18.9      | 1.6    | 0.0    | 23.5     | 1.0      | 0.8    | 13.6      | 7.0       | 33.3      | 4.8    | 12.3      | 72.0  | 10.8 | 3.2   | 0.0        | 1.2     | 37.8     | 0.9   | 2.4  | 33.3    | 6.0   | 25.7   | 12.0     |
| o3 (high)                              | 100.0 | 100.0      | 20.7   | 14.0          | 17.3      | 2.0    | 0.0    | 27.5     | 2.0      | 0.7    | 13.6      | 10.0      | 54.4      | 6.4    | 6.0       | 74.0  | 9.6  | 3.2   | 0.0        | 1.2     | 28.9     | 0.4   | 4.7  | 40.7    | 7.6   | 31.4   | 12.3     |
| gpt-5 (thinking)                       | 100.0 | 100.0      | 27.7   | 9.8           | 26.4      | 2.4    | 0.0    | 27.5     | 6.0      | 1.1    | 12.0      | 10.3      | 38.3      | 4.8    | 12.8      | 65.0  | 12.0 | 2.5   | 0.0        | 1.2     | 35.6     | 1.1   | 5.3  | 39.3    | 6.0   | 40.0   | 11.2     |
| o3 (low)                               | 80.0  | 40.0       | 23.2   | 4.2           | 19.2      | 1.2    | 0.0    | 29.4     | 0.0      | 0.5    | 16.8      | 13.8      | 36.7      | 4.0    | 13.8      | 72.0  | 6.0  | 2.5   | 0.0        | 0.8     | 42.2     | 1.8   | 2.9  | 26.7    | 3.6   | 22.9   | 10.3     |
| claude-3.7-sonnet (thinking)           | 40.0  | 26.7       | 17.6   | 1.4           | 36.0      | 0.8    | 0.0    | 25.5     | 2.0      | 0.3    | 16.8      | 8.1       | 76.7      | 4.8    | 13.2      | 58.0  | 6.0  | 2.5   | 0.0        | 0.5     | 31.1     | 0.0   | 1.8  | 6.7     | 6.8   | 20.0   | 8.8      |
| claude-3.7-sonnet                      | 0.0   | 6.7        | 19.4   | 0.0           | 35.5      | 1.6    | 4.0    | 39.2     | 0.0      | 0.0    | 20.0      | 8.8       | 88.9      | 4.0    | 13.8      | 66.0  | 0.0  | 2.5   | 0.0        | 1.0     | 40.0     | 0.0   | 2.9  | 33.3    | 0.0   | 28.6   | 8.1      |
| claude-3.5-sonnet-latest               | 0.0   | 33.3       | 12.1   | 5.6           | 15.2      | 0.4    | 0.0    | 25.9     | 0.0      | 0.1    | 20.0      | 8.8       | 67.2      | 4.0    | 12.8      | 75.0  | 0.0  | 2.5   | 0.0        | 0.2     | 37.8     | 0.0   | 3.5  | 33.3    | 0.0   | 2.9    | 8.7      |
| gpt-4.1                                | 0.0   | 0.0        | 10.3   | 0.0           | 4.3       | 0.0    | 0.0    | 23.5     | 0.0      | 0.3    | 8.8       | 5.9       | 65.6      | 4.0    | 5.8       | 39.0  | 9.0  | 2.5   | 0.0        | 0.5     | 4.4      | 0.0   | 0.0  | 13.3    | 0.0   | 2.9    | 7.9      |
| gpt-5-mini (thinking)                  | 40.0  | 20.0       | 10.3   | 7.0           | 5.1       | 0.4    | 0.0    | 19.6     | 2.0      | 0.2    | 5.6       | 9.3       | 31.1      | 5.6    | 9.8       | 22.0  | 1.2  | 2.5   | 0.0        | 0.2     | 11.1     | 0.9   | 1.8  | 11.3    | 4.0   | 25.7   | 8.3      |
| o1                                     | 80.0  | 66.7       | 13.9   | 1.4           | 1.1       | 0.0    | 0.0    | 23.9     | 0.0      | 0.0    | 9.6       | 6.7       | 27.2      | 4.8    | 12.5      | 58.0  | 0.0  | 2.5   | 0.0        | 1.0     | 4.4      | 0.0   | 1.8  | 34.7    | 0.0   | 14.3   | 7.9      |
| gpt-4o                                 | 0.0   | 0.0        | 10.3   | 0.0           | 1.1       | 0.4    | 0.0    | 13.7     | 0.0      | 0.0    | 0.0       | 6.3       | 34.4      | 0.0    | 4.2       | 38.0  | 7.8  | 2.5   | 0.0        | 1.2     | 4.4      | 0.0   | 1.2  | 13.3    | 0.8   | 5.7    | 0.8      |
| claude-3.5-haiku                       | 0.0   | 20.0       | 10.3   | 0.0           | 0.0       | 0.0    | 0.0    | 19.6     | 0.0      | 0.0    | 2.4       | 5.7       | 25.0      | 0.8    | 3.2       | 23.0  | 0.0  | 2.5   | 0.0        | 0.0     | 0.0      | 0.4   | 0.0  | 0.0     | 0.0   | 11.4   | 2.3      |
| claude-3.40B-Instruct                  | 0.0   | 0.0        | 11.7   | 0.0           | 4.5       | 0.8    | 0.0    | 19.6     | 0.0      | 0.0    | 5.6       | 5.6       | 28.9      | 4.0    | 4.0       | 51.0  | 0.8  | 1.0   | 0.0        | 1.2     | 0.0      | 0.0   | 0.0  | 20.0    | 0.0   | 14.3   | 2.3      |
| gemini-2.0-flash                       | 0.0   | 0.0        | 10.3   | 0.0           | 1.6       | 0.0    | 0.0    | 19.6     | 0.0      | 0.0    | 5.6       | 5.6       | 28.9      | 4.0    | 4.0       | 51.0  | 0.8  | 1.0   | 0.0        | 0.0     | 0.0      | 0.0   | 0.0  | 20.0    | 0.0   | 14.3   | 2.3      |
| Qwen2.5-72B-Instruct                   | 0.0   | 6.7        | 10.3   | 0.0           | 3.9       | 0.8    | 0.0    | 19.6     | 2.0      | 0.0    | 1.0       | 4.5       | 31.1      | 3.2    | 3.8       | 31.0  | 0.8  | 2.5   | 0.0        | 0.0     | 0.0      | 0.4   | 2.4  | 3.3     | 4.0   | 11.4   | 3.2      |
| Llama-3.3-70B-Instruct                 | 0.0   | 0.0        | 10.3   | 0.0           | 0.0       | 1.2    | 0.0    | 11.8     | 0.0      | 0.0    | 0.0       | 5.3       | 36.1      | 4.8    | 0.0       | 23.0  | 0.0  | 0.0   | 0.0        | 0.5     | 0.0      | 0.0   | 0.0  | 33.3    | 0.0   | 14.3   | 2.7      |
| Llama-3.1-70B-Instruct                 | 0.0   | 0.0        | 10.3   | 0.0           | 0.8       | 0.0    | 0.0    | 19.6     | 0.0      | 0.0    | 5.6       | 5.6       | 28.9      | 4.8    | 0.0       | 22.0  | 0.0  | 0.0   | 0.0        | 0.0     | 0.0      | 0.0   | 0.0  | 0.0     | 0.0   | 14.3   | 0.9      |
| Qwen2.5-72B-Instruct                   | 0.0   | 0.0        | 10.3   | 0.0           | 1.6       | 0.0    | 0.0    | 11.8     | 0.0      | 0.0    | 0.0       | 4.5       | 33.3      | 8.0    | 0.0       | 41.0  | 0.0  | 2.5   | 0.0        | 0.2     | 11.1     | 0.0   | 0.0  | 0.0     | 0.0   | 14.3   | 1.3      |
| Mistral-Large-Instruct-2407            | 60.0  | 0.0        | 10.3   | 0.0           | 0.0       | 0.0    | 0.0    | 13.7     | 0.0      | 0.0    | 0.0       | 6.2       | 41.7      | 0.0    | 6.5       | 14.0  | 0.0  | 1.0   | 0.0        | 0.0     | 0.0      | 0.0   | 0.0  | 0.0     | 0.0   | 0.0    | 0.7      |
| gpt-4.1-mini                           | 0.0   | 0.0        | 10.3   | 0.0           | 0.0       | 0.0    | 0.0    | 9.8      | 0.0      | 0.2    | 2.4       | 6.2       | 3.4       | 8.3    | 0.0       | 2.0   | 2.4  | 0.0   | 0.0        | 0.0     | 0.0      | 0.0   | 0.0  | 0.0     | 0.0   | 0.0    | 0.8      |
| gpt-4o-mini                            | 0.0   | 0.0        | 10.3   | 0.0           | 0.0       | 0.0    | 0.0    | 9.8      | 0.0      | 0.0    | 3.2       | 3.4       | 8.3       | 0.0    | 0.0       | 0.0   | 0.0  | 0.5   | 0.0        | 0.0     | 0.0      | 0.0   | 0.0  | 0.0     | 0.0   | 0.0    | 0.7      |
| Llama-4-Scout-17B-16E-Instruct         | 0.0   | 0.0        | 10.3   | 0.0           | 2.7       | 0.0    | 0.0    | 0.0      | 0.0      | 0.0    | 0.0       | 1.2       | 12.2      | 0.0    | 0.8       | 0.0   | 0.0  | 0.0   | 0.0        | 0.0     | 0.0      | 0.0   | 0.0  | 0.0     | 0.0   | 0.0    | 0.7      |
| gpt-5-nano                             | 0.0   | 0.0        | 10.3   | 0.0           | 0.0       | 0.0    | 0.0    | 0.0      | 0.0      | 0.0    | 0.0       | 0.0       | 6.3       | 0.0    | 0.0       | 0.0   | 0.0  | 0.0   | 0.0        | 0.0     | 0.0      | 0.0   | 0.0  | 0.0     | 0.0   | 0.0    | 0.7      |
| Llama-4-Maverick-17B-128E-Instruct-FP8 | 0.0   | 0.0        | 10.3   | 0.0           | 0.0       | 0.0    | 0.0    | 5.9      | 0.0      | 0.0    | 7.2       | 4.1       | 8.3       | 0.0    | 5.0       | 10.0  | 0.0  | 0.0   | 0.0        | 0.0     | 0.0      | 0.0   | 0.0  | 0.0     | 0.0   | 0.0    | 0.7      |
| Mistral-Small-Instruct-2409            | 0.0   | 0.0        | 10.3   | 0.0           | 0.0       | 0.0    | 0.0    | 0.0      | 0.0      | 0.0    | 0.0       | 4.0       | 8.3       | 3.2    | 0.0       | 2.0   | 0.0  | 0.0   | 0.0        | 0.0     | 0.0      | 0.0   | 0.0  | 0.0     | 0.0   | 0.0    | 0.7      |
| Llama-3.1-8B-Instruct                  | 0.0   | 0.0        | 10.3   | 0.0           | 0.5       | 0.0    | 0.0    | 15.7     | 0.0      | 0.0    | 0.8       | 4.3       | 15.6      | 0.0    | 0.0       | 0.0   | 0.0  | 0.0   | 0.0        | 0.0     | 0.0      | 0.0   | 0.0  | 0.0     | 0.0   | 0.0    | 0.7      |
| DeepSeek-R1                            | 0.0   | 0.0        | 10.3   | 0.0           | 0.0       | 0.0    | 0.0    | 0.0      | 0.0      | 0.0    | 4.0       | 0.3       | 11.1      | 0.0    | 0.0       | 0.0   | 0.0  | 0.0   | 0.0        | 0.0     | 0.0      | 0.0   | 0.0  | 0.0     | 0.0   | 0.0    | 1.3      |
| Qwen2.5-7B-Instruct                    | 0.0   | 0.0        | 10.3   | 0.0           | 0.0       | 0.0    | 0.0    | 0.0      | 0.0      | 0.0    | 1.6       | 2.6       | 2.8       | 0.0    | 0.0       | 0.0   | 0.0  | 0.0   | 0.0        | 0.0     | 0.0      | 0.0   | 0.0  | 0.0     | 0.0   | 0.0    | 0.9      |
| Llama-3.2-3B-Instruct                  | 0.0   | 0.0        | 10.3   | 0.0           | 0.0       | 0.0    | 0.0    | 3.9      | 0.0      | 0.0    | 1.6       | 0.3       | 8.3       | 0.0    | 0.0       | 0.0   | 0.0  | 0.0   | 0.0        | 0.0     | 0.0      | 0.0   | 0.0  | 0.0     | 0.0   | 0.0    | 1.3      |
| phi-4                                  | 0.0   | 0.0        | 10.3   | 0.0           | 0.0       | 0.0    | 0.0    | 9.8      | 0.0      | 0.0    | 0.0       | 2.7       | 8.3       | 0.0    | 0.0       | 0.0   | 0.0  | 0.0   | 0.0        | 0.0     | 0.0      | 0.0   | 0.0  | 16.7    | 0.0   | 0.0    | 0.7      |
| gpt-4.1-nano                           | 0.0   | 0.0        | 10.3   | 0.0           | 0.0       | 0.0    | 0.0    | 7.8      | 0.0      | 0.0    | 3.2       | 1.7       | 18.9      | 0.0    | 0.0       | 0.0   | 0.0  | 0.0   | 0.0        | 0.0     | 0.0      | 0.0   | 0.0  | 0.0     | 0.0   | 0.0    | 0.7      |
| Mistral-Small-24B-Instruct-2501        | 0.0   | 0.0        | 10.3   | 0.0           | 0.0       | 0.0    | 0.0    | 0.0      | 0.0      | 0.0    | 1.6       | 3.2       | 13.9      | 0.0    | 0.0       | 0.0   | 0.0  | 0.0   | 0.0        | 0.0     | 0.0      | 0.0   | 0.0  | 0.0     | 0.0   | 0.0    | 0.7      |
| DeepSeek-R1-Distill-Llama-70B          | 0.0   | 0.0        | 10.3   | 0.0           | 0.8       | 0.0    | 0.0    | 7.8      | 0.0      | 0.0    | 1.6       | 1.7       | 5.0       | 0.0    | 0.0       | 0.0   | 0.0  | 0.0   | 0.0        | 0.0     | 0.0      | 0.0   | 0.0  | 0.0     | 0.0   | 0.0    | 0.7      |
| Mistral-8B-Instruct-2410               | 0.0   | 0.0        | 10.3   | 0.0           | 0.0       | 0.0    | 0.0    | 0.0      | 0.0      | 0.0    | 0.0       | 0.3       | 11.1      | 0.0    | 0.0       | 0.0   | 0.0  | 0.0   | 0.0        | 0.0     | 0.0      | 0.0   | 0.0  | 0.0     | 0.0   | 0.0    | 0.7      |
| Mistral-Small-3.1-24B-Instruct-2503    | 0.0   | 0.0        | 10.3   | 0.0           | 0.0       | 0.0    | 0.0    | 9.8      | 0.0      | 0.0    | 0.0       | 0.3       | 5.6       | 0.0    | 0.0       | 0.0   | 0.0  | 0.0   | 0.0        | 0.0     | 0.0      | 0.0   | 0.0  | 0.0     | 0.0   | 0.0    | 0.7      |
| Mistral-8x22B-Instruct-v0.1            | 0.0   | 0.0        | 10.3   | 0.0           | 0.0       | 0.0    | 0.0    | 0.0      | 0.0      | 0.0    | 0.0       | 0.3       | 6.7       | 0.0    | 0.0       | 0.0   | 0.0  | 0.0   | 0.0        | 0.0     | 0.0      | 0.0   | 0.0  | 0.0     | 0.0   | 0.0    | 0.7      |
| Llama-3.2-1B-Instruct                  | 0.0   | 0.0        | 10.3   | 0.0           | 0.0       | 0.0    | 0.0    | 0.0      | 0.0      | 0.0    | 0.0       | 0.3       | 3.3       | 0.0    | 0.0       | 0.0   | 0.0  | 0.0   | 0.0        | 0.0     | 0.0      | 0.0   | 0.0  | 0.0     | 0.0   | 0.0    | 0.7      |
| Phi-3-mini-128k-instruct               | 0.0   | 0.0        | 10.3   | 0.0           | 0.0       | 0.0    | 0.0    | 0.0      | 0.0      | 0.0    | 0.0       | 0.3       | 2.8       | 0.0    | 0.0       | 0.0   | 0.0  | 0.0   | 0.0        | 0.0     | 0.0      | 0.0   | 0.0  | 0.0     | 0.0   | 0.0    | 0.7      |
| Phi-3.5-MoE-instruct                   | 0.0   | 0.0        | 10.3   | 0.0           | 0.0       | 0.0    | 0.0    | 0.0      | 0.0      | 0.0    | 0.0       | 0.3       | 2.8       | 0.0    | 0.0       | 0.0   | 0.0  | 0.0   | 0.0        | 0.0     | 0.0      | 0.0   | 0.0  | 0.0     | 0.0   | 0.0    | 0.7      |
| Phi-4-mini-instruct                    | 0.0   | 0.0        | 10.3   | 0.0           | 0.0       | 0.0    | 0.0    | 0.0      | 0.0      | 0.0    | 0.0       | 0.3       | 2.8       | 0.0    | 0.0       | 0.0   | 0.0  | 0.0   | 0.0        | 0.0     | 0.0      | 0.0   | 0.0  | 0.0     | 0.0   | 0.0    | 0.8      |
| Mistral-8x7B-Instruct-v0.1             | 0.0   | 0.0        | 10.3   | 0.0           | 0.0       | 0.0    | 0.0    | 0.0      | 0.0      | 0.0    | 0.0       | 0.3       | 2.8       | 0.0    | 0.0       | 0.0   | 0.0  | 0.0   | 0.0        | 0.0     | 0.0      | 0.0   | 0.0  | 0.0     | 0.0   | 0.0    | 0.8      |
| Phi-3.5-mini-instruct                  | 0.0   | 0.0        | 10.3   | 0.0           | 0.0       | 0.0    | 0.0    | 0.0      | 0.0      | 0.0    | 0.0       | 0.3       | 2.8       | 0.0    | 0.0       | 0.0   | 0.0  | 0.0   | 0.0        | 0.0     | 0.0      | 0.0   | 0.0  | 0.0     | 0.0   | 0.0    | 0.8      |
| Phi-3-medium-128k-instruct             | 0.0   | 0.0        | 10.3   | 0.0           | 0.0       | 0.0    | 0.0    | 0.0      | 0.0      | 0.0    | 0.0       | 0.3       | 2.8       | 0.0    | 0.0       | 0.0   | 0.0  | 0.0   | 0.0        | 0.0     | 0.0      | 0.0   | 0.0  | 0.0     | 0.0   | 0.0    | 0.7      |

Table 17: Model Performance on JERICHO games(tasks), part 2.

| Models                                 | Lurking | Moonlit | Murder | Night | Omniquest | Partyfoul | Pentari | Planetfall | Plundered | Reverb | Seastalker | Sherlock | Snacktime | Sorcerer | Spellbkr | Spirit | Temple | Trinity | Trys205 | Weapon | Wishbringer | Yomomma | Zenon | Zork1 | Zork2 | Zork3 | Zhu  |
|----------------------------------------|---------|---------|--------|-------|-----------|-----------|---------|------------|-----------|--------|------------|----------|-----------|----------|----------|--------|--------|---------|---------|--------|-------------|---------|-------|-------|-------|-------|------|
| o3 (medium)                            | 5.0     | 0.0     | 9.8    | 24.0  | 26.0      | 0.0       | 7.1     | 7.5        | 2.4       | 30.0   | 4.0        | 11.4     | 40.0      | 7.0      | 9.2      | 0.6    | 16.0   | 12.0    | 3.4     | 0.0    | 13.2        | 2.9     | 0.0   | 15.5  | 0.0   | 42.9  | 2.0  |
| o3 (high)                              | 5.0     | 0.0     | 9.0    | 16.0  | 14.0      | 0.0       | 7.1     | 7.5        | 3.2       | 28.8   | 8.0        | 11.6     | 40.0      | 7.0      | 10.3     | 1.1    | 14.3   | 13.4    | 4.0     | 0.0    | 15.2        | 2.9     | 0.0   | 13.3  | 3.0   | 40.0  | 5.0  |
| gpt-5 (thinking)                       | 5.0     | 20.0    | 12.5   | 12.0  | 10.0      | 0.0       | 15.7    | 7.5        | 2.4       | 34.0   | 11.0       | 9.4      | 60.0      | 9.2      | 10.0     | 1.3    | 21.1   | 13.0    | 3.7     | 0.0    | 13.0        | 1.7     | 0.0   | 17.8  | 1.0   | 34.3  | 6.0  |
| o3 (low)                               | 5.0     | 0.0     | 6.8    | 24.0  | 14.0      | 0.0       | 12.9    | 7.5        | 3.2       | 24.0   | 11.2       | 9.2      | 40.0      | 7.0      | 10.7     | 1.3    | 16.0   | 14.2    | 0.9     | 0.0    | 13.4        | 2.9     | 0.0   | 14.4  | 0.0   | 48.6  | 3.0  |
| claude-3.7-sonnet (thinking)           | 5.0     | 0.0     | 11.3   | 20.0  | 10.0      | 0.0       | 7.1     | 4.5        | 4.0       | 20.6   | 18.6       | 10.6     | 36.0      | 5.3      | 11.5     | 1.0    | 14.3   | 11.8    | 0.6     | 0.0    | 11.6        | 0.0     | 0.0   | 12.2  | 0.0   | 40.0  | 5.0  |
| claude-3.7-sonnet                      | 5.0     | 0.0     | 10.8   | 20.0  | 10.0      | 0.0       | 7.1     | 3.8        | 2.4       | 4.0    | 20.6       | 10.6     | 32.0      | 9.2      | 11.7     | 1.4    | 14.3   | 13.8    | 0.3     | 0.0    | 13.0        | 0.0     | 0.0   | 13.5  | 0.0   | 42.9  | 5.0  |
| claude-3.5-sonnet-latest               | 5.0     | 0.0     | 8.7    | 0.0   | 10.0      | 0.0       | 10.0    | 6.8        | 6.4       | 0.0    | 7.8        | 8.2      | 24.0      | 7.2      | 11.7     | 1.4    | 2.9    | 0.0     | 0.3     | 0.0    | 13.8        | 0.0     | 0.0   | 11.7  | 4.0   | 40.0  | 6.0  |
| gpt-4.1                                | 5.0     | 0.0     | 8.7    | 8.0   | 10.0      | 0.0       | 7.5     | 6.8        | 6.4       | 0.0    | 7.8        | 8.2      | 24.0      | 7.2      | 11.7     | 0.5    | 16.0   | 9.2     | 0.0     | 0.0    | 13.8        | 1.1     | 0.0   | 17.6  | 1.0   | 32.4  | 4.0  |
| gpt-5-mini (thinking)                  | 5.0     | 0.0     | 8.7    | 8.0   | 10.0      | 0.0       | 7.1     | 2.2        | 2.4       | 6.8    | 10.4       | 7.2      | 40.0      | 4.2      | 6.7      | 1.1    | 11.4   | 9.4     | 0.6     | 0.0    | 13.8        | 2.3     | 0.0   | 7.0   | 1.0   | 42.9  | 9.6  |
| gpt-4o                                 | 7.0     | 0.0     | 8.6    | 0.0   | 12.0      | 0.0       | 8.6     | 3.8        | 4.0       | 8.8    | 3.8        | 0.4      | 40.0      | 7.8      | 9.2      | 0.0    | 11.4   | 9.4     | 1.7     | 0.0    | 13.8        | 0.6     | 0.0   | 12.5  | 1.0   | 42.9  | 9.6  |
| gpt-4o                                 | 5.0     | 0.0     | 5.6    | 0.0   | 10.0      | 0.0       | 8.6     | 7.5        | 3.2       | 0.0    | 3.2        | 8.8      | 20.0      | 3.2      | 8.0      | 0.8    | 0.0    | 9.6     | 0.9     | 0.0    | 7.4         | 0.0     | 0.0   | 14.5  | 0.0   | 31.4  | 0.0  |
| claude-3.5-haiku                       | 5.0     | 0.0     | 5.3    | 0.0   | 10.0      | 0.0       | 5.7     | 6.8        | 2.4       | 14.0   | 10.8       | 0.0      | 8.0       | 2.0      | 4.2      | 0.3    | 0.0    | 9.0     | 0.0     | 0.0    | 11.8        | 1.7     | 0.0   | 13.1  | 0.0   | 31.4  | 0.0  |
| claude-3.1-405B-Instruct               | 5.0     | 0.0     | 5.2    | 20.0  | 10.0      | 0.0       | 7.1     | 3.8        | 0.0       | 10.6   | 10.6       | 2.6      | 24.0      | 1.2      | 4.2      | 1.3    | 14.3   | 4.0     | 0.0     | 0.0    | 6.0         | 0.0     | 0.0   | 11.1  | 0.0   | 28.6  | 13.0 |
| gemini-2.0-flash                       | 5.0     | 0.0     | 4.4    | 0.0   | 8.0       | 0.0       | 4.3     | 3.8        | 1.6       | 0.0    | 8.2        | 10.4     | 40.0      | 1.2      | 6.7      | 1.3    | 0.0    | 4.8     | 0.0     | 0.0    | 11.6        | 0.0     | 0.0   | 9.4   | 0.0   | 25.7  | 1.0  |
| Owen3-32B                              | 3.0     | 0.0     | 4.4    | 0.0   | 0.0       | 0.0       | 5.7     | 0.0        | 4.0       | 0.0    | 17.4       | 2.4      | 0.0       | 1.2      | 4.2      | 0.0    | 0.0    | 4.4     | 0.0     | 0.0    | 7.4         | 0.0     | 0.0   | 9.4   | 0.0   | 42.9  | 4.0  |
| Llama-3.3-70B-Instruct                 | 2.0     | 0.0     | 5.6    | 0.0   | 10.0      | 0.0       | 2.9     | 3.8        | 4.0       | 0.0    | 21.0       | 3.8      | 0.0       | 1.7      | 4.2      | 0.0    | 0.0    | 8.4     | 0.0     | 0.0    | 11.6        | 0.0     | 0.0   | 4.3   | 0.0   | 31.4  | 3.0  |
| Llama-3.1-70B-Instruct                 | 2.0     | 0.0     | 5.6    | 0.0   | 10.0      | 0.0       | 4.3     | 5.3        | 1.6       | 0.0    | 9.6        | 2.2      | 4.0       | 1.2      | 4.2      | 0.0    | 0.0    | 16.0    | 8.4     | 0.0    | 6.0         | 0.0     | 0.0   | 3.1   | 0.0   | 42.9  | 13.0 |
| Qwen2.5-72B-Instruct                   | 5.0     | 0.0     | 4.6    | 4.0   | 10.0      | 0.0       | 0.0     | 3.8        | 0.0       | 0.0    | 9.8        | 3.6      | 16.0      | 1.2      | 4.2      | 0.0    | 0.0    | 5.0     | 0.0     | 0.0    | 1.0         | 0.0     | 0.0   | 2.3   | 0.0   | 28.6  | 0.0  |
| Mistral-Large-Instruct-2407            | 5.0     | 0.0     | 5.6    | 0.0   | 0.0       | 0.0       | 2.9     | 0.8        | 0.0       | 0.0    | 3.2        | 8.8      | 24.0      | 2.0      | 7.2      | 1.6    | 0.0    | 2.8     | 0.0     | 0.0    | 6.0         | 0.0     | 0.0   | 12.8  | 0.0   | 28.6  | 0.0  |
| gpt-4.1-mini                           | 5.0     | 0.0     | 5.6    | 0.0   | 10.0      | 0.0       | 0.0     | 4.5        | 0.8       | 0.0    | 2.8        | 1.6      | 0.0       | 1.2      | 7.0      | 0.3    | 0.0    | 3.0     | 0.0     | 0.0    | 6.4         | 0.6     | 0.0   | 6.9   | 0.0   | 28.6  | 1.0  |
| gpt-4o-mini                            | 4.0     | 0.0     | 5.6    | 0.0   | 10.0      | 0.0       | 0.0     | 2.2        | 0.0       | 0.0    | 3.0        | 1.4      | 0.0       | 1.7      | 3.3      | 0.3    | 0.0    | 7.4     | 0.0     | 0.0    | 6.0         | 0.0     | 0.0   | 3.1   | 2.0   | 5.7   | 0.0  |
| Llama-4-Scout-17B-16E-Instruct         | 5.0     | 0.0     | 0.0    | 0.0   | 0.0       | 0.0       | 0.0     | 3.8        | 0.0       | 0.0    | 3.0        | 0.0      | 0.0       | 1.2      | 4.2      | 0.0    | 0.0    | 4.0     | 0.0     | 0.0    | 6.0         | 0.0     | 0.0   | 1.4   | 0.0   | 42.9  | 0.0  |
| gpt-5-nano                             | 4.0     | 0.0     | 0.0    | 0.0   | 2.0       | 0.0       | 0.0     | 3.0        | 0.0       | 0.0    | 2.6        | 1.4      | 0.0       | 1.2      | 5.2      | 0.2    | 0.0    | 3.8     | 0.0     | 0.0    | 6.0         | 0.0     | 0.0   | 0.6   | 0.0   | 28.6  | 0.0  |
| Llama-4-Maverick-17B-128E-Instruct-PP8 | 0.0     | 0.0     | 1.3    | 12.0  | 10.0      | 0.0       | 4.3     | 3.8        | 0.0       | 0.0    | 3.0        | 1.2      | 0.0       | 1.2      | 4.7      | 0.0    | 0.0    | 0.6     | 0.0     | 0.0    | 6.0         | 0.0     | 0.0   | 2.0   | 0.0   | 0.0   | 0.0  |
| Mistral-Small-Instruct-2409            | 0.0     | 0.0     | 0.0    | 0.0   | 10.0      | 0.0       | 7.1     | 3.8        | 0.0       | 0.0    | 2.0        | 0.0      | 0.0       | 1.2      | 4.7      | 0.0    | 0.0    | 1.0     | 0.0     | 0.0    | 6.0         | 0.0     | 0.0   | 1.4   | 0.0   | 0.0   | 0.0  |
| Llama-3.1-8B-Instruct                  | 3.0     | 0.0     | 3.4    | 0.0   | 10.0      | 0.0       | 0.0     | 3.0        | 0.0       | 0.0    | 3.0        | 0.0      | 0.0       | 1.2      | 3.3      | 0.2    | 8.6    | 1.0     | 0.0     | 0.0    | 6.0         | 0.0     | 0.0   | 2.0   | 0.0   | 17.1  | 2.0  |
| DeepSeek-R1                            | 0.0     | 0.0     | 0.0    | 0.0   | 10.0      | 0.0       | 0.0     | 0.0        | 0.0       | 0.0    | 3.0        | 0.0      | 0.0       | 1.2      | 0.0      | 0.0    | 0.0    | 0.0     | 0.0     | 0.0    | 6.0         | 0.0     | 0.0   | 2.9   | 0.0   | 0.0   | 0.0  |
| Qwen2.5-7B-Instruct                    | 0.0     | 0.0     | 0.0    | 0.0   | 10.0      | 0.0       | 0.0     | 0.0        | 0.0       | 0.0    | 2.6        | 0.0      | 0.0       | 1.2      | 0.0      | 0.0    | 0.0    | 4.0     | 0.0     | 0.0    | 1.0         | 0.0     | 0.0   | 0.0   | 0.0   | 0.0   | 0.0  |
| Llama-3.2-3B-Instruct                  | 0.0     | 0.0     | 0.0    | 0.0   | 10.0      | 0.0       | 0.0     | 0.0        | 0.0       | 0.0    | 2.4        | 0.0      | 0.0       | 1.2      | 4.2      | 0.0    | 0.0    | 4.0     | 0.0     | 0.0    | 6.0         | 0.0     | 0.0   | 1.4   | 0.0   | 11.4  | 0.0  |
| phi-4                                  | 0.0     | 0.0     | 0.0    | 0.0   | 10.0      | 0.0       | 0.0     | 0.0        | 0.0       | 0.0    | 3.0        | 0.0      | 0.0       | 0.0      | 0.0      | 0.8    | 14.3   | 0.0     | 0.0     | 0.0    | 6.0         | 0.0     | 0.0   | 0.6   | 0.0   | 0.0   | 0.0  |
| gpt-4.1-nano                           | 1.0     | 0.0     | 0.0    | 0.0   | 10.0      | 0.0       | 0.0     | 3.0        | 0.0       | 0.0    | 2.6        | 102.0    | 0.0       | 1.2      | 0.0      | 0.2    | 0.0    | 0.0     | 0.0     | 0.0    | 6.0         | 0.0     | 0.0   | 2.0   | 0.0   | 22.9  | 0.0  |
| Mistral-Small-24B-Instruct-2501        | 0.0     | 0.0     | 0.0    | 0.0   | 10.0      | 0.0       | 0.0     | 0.0        | 0.0       | 0.0    | 3.0        | 0.0      | 0.0       | 1.2      | 0.0      | 0.2    | 5.7    | 1.6     | 0.0     | 0.0    | 4.0         | 0.0     | 0.0   | 0.0   | 0.0   | 14.3  | 0.0  |
| DeepSeek-R1-Distill-Llama-70B          | 1.0     | 0.0     | 0.2    | 0.0   | 10.0      | 0.0       | 0.0     | 0.0        | 0.0       | 0.0    | 2.2        | 0.0      | 0.0       | 1.2      | 0.0      | 0.0    | 2.9    | 0.0     | 0.0     | 0.0    | 4.0         | 0.0     | 0.0   | 2.9   | 0.0   | 14.3  | 0.0  |
| Mistral-8B-Instruct-v0.1               | 0.0     | 0.0     | 0.0    | 0.0   | 10.0      | 0.0       | 0.0     | 0.0        | 0.0       | 0.0    | 0.0        | 0.0      | 0.0       | 1.2      | 0.0      | 0.0    | 0.0    | 0.0     | 0.0     | 0.0    | 6.0         | 0.0     | 0.0   | 0.0   | 0.0   | 0.0   | 0.0  |
| Mistral-8x22B-Instruct-v0.1            | 0.0     | 0.0     | 0.0    | 0.0   | 10.0      | 0.0       | 0.0     | 0.0        | 0.0       | 0.0    | 1.2        | 0.0      | 0.0       | 1.2      | 0.0      | 0.0    | 0.0    | 0.0     | 0.0     | 0.0    | 6.0         | 0.0     | 0.0   | 0.0   | 0.0   | 0.0   | 0.0  |
| Llama-3.2-7B-Instruct-v0.1             | 0.0     | 0.0     | 0.0    | 0.0   | 2.0       | 0.0       | 0.0     | 0.0        | 0.0       | 0.0    | 1.2        | 0.0      | 0.0       | 0.0      | 0.0      | 0.3    | 0.0    | 2.2     | 0.0     | 0.0    | 0.0         | 0.0     | 0.0   | 0.0   | 0.0   | 0.0   | 0.0  |
| Llama-3.2-128K-Instruct                | 0.0     | 0.0     | 0.0    | 0.0   | 0.0       | 0.0       | 0.0     | 0.0        | 0.0       | 0.0    | 0.0        | 0.0      | 0.0       | 1.2      | 0.0      | 0.0    | 0.0    | 0.0     | 0.0     | 0.0    | 0.0         | 0.0     | 0.0   | 0.0   | 0.0   | 0.0   | 0.0  |
| Phi-3-mini-128K-Instruct               | 0.0     | 0.0     | 0.0    | 0.0   | 0.0       | 0.0       | 0.0     | 0.0        | 0.0       | 0.0    | 0.0        | 0.0      | 0.0       | 0.2      | 0.0      | 0.0    | 0.0    | 0.0     | 0.0     | 0.0    | 1.2         | 0.0     | 0.0   | 0.0   | 0.0   | 0.0   | 0.0  |
| Phi-3.5-MoE-Instruct                   | 0.0     | 0.0     | 0.0    | 0.0   | 8.0       | 0.0       | 0.0     | 0.0        | 0.0       | 0.0    | 0.0        | 0.0      | 0.0       | 0.2      | 0.0      | 0.0    | 0.0    | 0.0     | 0.0     | 0.0    | 1.6         | 0.0     | 0.0   | 0.0   | 0.0   | 0.0   | 0.0  |
| Phi-4-mini-Instruct                    | 0.0     | 0.0     | 0.0    | 0.0   | 0.0       | 0.0       | 0.0     | 0.0        | 0.0       | 0.0    | 0.0        | 0.0      | 0.0       | 1.2      | 0.0      | 0.0    | 0.0    | 1.0     | 0.0     | 0.0    | 0.0         | 0.0     | 0.0   | 0.0   | 0.0   | 0.0   | 0.0  |
| Mistral-8x7B-Instruct-v0.1             | 0.0     | 0.0     | 0.0    | 0.0   | 10.0      | 0.0       | 0.0     | 0.0        | 0.0       | 0.0    | 2.4        | 0.0      | 0.0       | 0.5      | 0.0      | 0.0    | 0.0    | 0.0     | 0.0     | 0.0    | 1.0         | 0.0     | 0.0   | 0.0   | 0.0   | 0.0   | 0.0  |
| Phi-3.5-mini-Instruct                  | 0.0     | 0.0     | 0.0    | 0.0   | 10.0      | 0.0       | 0.0     | 0.0        | 0.0       | 0.0    | 0.0        | 0.0      | 0.0       | 0.5      | 0.0      | 0.0    | 0.0    | 0.0     | 0.0     | 0.0    | 0.2         | 0.0     | 0.0   | 0.0   | 0.0   | 0.0   | 0.0  |
| Phi-3-medium-128K-Instruct             | 0.0     | 0.0     | 0.0    | 0.0   | 0.0       | 0.0       | 0.0     | 0.0        | 0.0       | 0.0    | 0.0        | 0.0      | 0.0       | 0.0      | 0.0      | 0.0    | 0.0    | 0.0     | 0.0     | 0.0    | 0.0         | 0.0     | 0.0   | 0.0   | 0.0   | 0.0   | 0.0  |

## K AVERAGE SIMON SAYS SCORE VERSUS OVERALL TALES SCORE

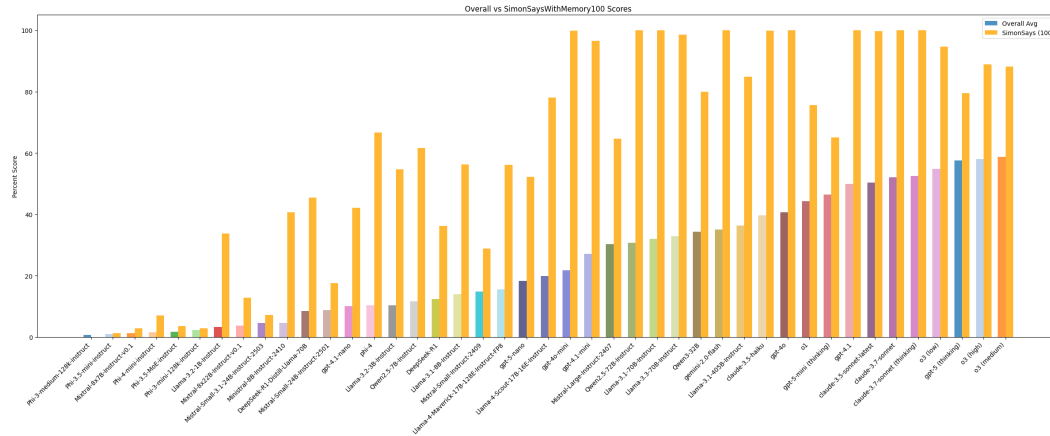

Figure 2: All TALES and average SIMON SAYS scores for each model, sorted by TALES performance. We see that an increase in performance in SIMON SAYS typically correlates with an increase in performance for TALES overall.

## L COMPUTE

All experiments were run intermittently over a course of roughly six months. Open-weight models were run on a combination of a four node cluster of 8xMI300s and one node of 8xA100s. Anthropic API experiments accrued a cost of 1,562.15 U.S. dollars. OpenAI API experiments accrued an estimated cost of 6,870.76 U.S. dollars.

## M 1000 STEPS OF ZORK1

While even the best performing LLMs make reasoning mistakes, we find what allows them to still find success in TALES is the ability to both avoid making an excessive number of these mistakes and the ability to self-correct. We argue that 100 steps are sufficient to evaluate the performance of current state-of-the-art LLMs because even the best overall LLM, o3, fails to approach the maximum possible score within 100 steps for ZORK1 (13.8% vs 29.1%). In this experiment, we explore whether any of the top models can achieve a score comparable to the walkthrough after 100 steps in ZORK1 while allowed to run for 1000 steps with the entire history kept in the context. If so, we examine the behaviors that enable this and determine the required number of steps. We select the overall top 3 performing models, o3 and both the thinking and non-thinking modes of Claude-3.7-Sonnet.

**Scores improve slightly, but the best LLMs are still far from the walkthrough score even with 10 times more steps.** That is with 1000 steps, the best LLMs fail to reach 29.3% of the total score. o3 manages to achieve a score of 20.9%, a performance increase of only 7.6% over its original score of 13.3% for 10 times the steps. Claude-3.7 non-thinking<sup>5</sup> and thinking achieve 16.9% and 15.3% respectively. The key behavior pattern we see in both thinking models is a slightly directed, random exploration of the area of the game past the bottleneck that stops other, weaker LLMs. This exploration is far less focused than the iterative search we see agents perform early in the game and in simpler environments such as AW.

We tried allowing Claude-3.7-Sonnet to think for up to 4096 tokens. However, the model never uses more than 700 tokens for its thinking, a similar value seen for the rest of the benchmark where the thinking effort is capped to 1024. This is a significantly smaller thinking effort than o3 which uses up to 5000 thinking tokens throughout its 1000 steps ZORK1 walkthrough. This suggests that o3’s

<sup>5</sup>Despite scoring higher than its thinking variant, zero-shot Claude-3.7-Sonnet suffers a catastrophic inductive reasoning failure by repeatedly issuing the quitting commands after step 479.

performance is due to a willingness to leverage many more thinking tokens at any particular step. However, the highest thinking efforts do not appear to occur at any significant points during gameplay and we are unable to verify the actual contents since we do not have access to the thinking traces.

## N FRAMEWORK ENVIRONMENT SUBSELECTION

### N.1 TEXTWORLD

For TEXTWORLD, we use the following environments:

```
test/difficulty_level_1/tw-cooking-recipe1+take1+open-0nQyHWbv6dXFPmHLKX.z8
  ↪ XFPmHLKX.z8
test/difficulty_level_2/tw-cooking-recipe1+take1+cook+open-0nQyHWbv6dXFPmHLKX.z8
  ↪ bv6dXFPmHLKX.z8
test/difficulty_level_3/tw-cooking-recipe1+take1+cut+open-0nQyHWbv6dXFPmHLKX.z8
  ↪ vh6dXFPmHLKX.z8
test/difficulty_level_4/tw-cooking-recipe1+take1+open+go6-0nQyHWbv6dXFPmHLKX.z8
  ↪ vh6dXFPmHLKX.z8
test/difficulty_level_5/tw-cooking-recipe1+take1+open+go9-0nQyHWbv6dXFPmHLKX.z8
  ↪ vh6dXFPmHLKX.z8
test/difficulty_level_6/tw-cooking-recipe1+take1+open+go12-0nQyHWbv6dXFPmHLKX.z8
  ↪ bv6dXFPmHLKX.z8
test/difficulty_level_7/tw-cooking-recipe1+take1+cook+cut+open-0nQyHWbv6dXFPmHLKX.z8
  ↪ QyHWbv6dXFPmHLKX.z8
test/difficulty_level_8/tw-cooking-recipe3+take3+open+go6-0nQyHWbv6dXFPmHLKX.z8
  ↪ vh6dXFPmHLKX.z8
test/difficulty_level_9/tw-cooking-recipe3+take3+cook+cut+open+go6-0nQyHWbv6dXFPmHLKX.z8
  ↪ 6-0nQyHWbv6dXFPmHLKX.z8
test/difficulty_level_10/tw-cooking-recipe3+take3+cook+cut+open+go12-0nQyHWbv6dXFPmHLKX.z8
  ↪ o12-0nQyHWbv6dXFPmHLKX.z8
```

### N.2 TEXTWORLDEXPRESS

For TEXTWORLDEXPRESS, we use the game parameters:

```
TASKS = [
  (
    "CookingWorld",
    "cookingworld",
    "numLocations=1, numIngredients=2, numDistractorItems=5,
    ↪ includeDoors=0, limitInventorySize=0",
  ),
  (
    "TextWorldCommonsense",
    "twc",
    "numLocations=1, numItemsToPutAway=1, includeDoors=0, limitInventorySize=0",
    ↪ nventorySize=0",
  ),
  (
    "CoinCollector",
    "coin",
    "numLocations=1, numDistractorItems=5,
    ↪ limitInventorySize=0",
  ),
  ("Arithmetic", "arithmetic", ""),
  (
    "MapReader",
    "mapreader",
  ),
]
```

```

1512         "numLocations=2, maxDistanceApart=1,
1513         ↪ maxDistractorItemsPerLocation=2, includeDoors=0,
1514         ↪ limitInventorySize=0",
1515     ),
1516     ("Sorting", "sorting", ""),
1517     ("SimonSays10", "simonsays", "gameLength=10, numDistractors=4,
1518     ↪ memorization=0"),
1519     ("SimonSays50", "simonsays", "gameLength=50, numDistractors=4,
1520     ↪ memorization=0"),
1521     ("SimonSays100", "simonsays", "gameLength=100,
1522     ↪ numDistractors=4, memorization=0"),
1523     (
1524         "SimonSaysWithMemory10",
1525         "simonsays",
1526         "gameLength=10, numDistractors=4, memorization=1,
1527         ↪ verbose=0",
1528     ),
1529     (
1530         "SimonSaysWithMemory50",
1531         "simonsays",
1532         "gameLength=50, numDistractors=4, memorization=1,
1533         ↪ verbose=0",
1534     ),
1535     (
1536         "SimonSaysWithMemory100",
1537         "simonsays",
1538         "gameLength=100, numDistractors=4, memorization=1,
1539         ↪ verbose=0",
1540     ),
1541     (
1542         "SimonSaysWithMemory10Verbose",
1543         "simonsays",
1544         "gameLength=10, numDistractors=4, memorization=1,
1545         ↪ verbose=1",
1546     ),
1547     (
1548         "SimonSaysWithMemory50Verbose",
1549         "simonsays",
1550         "gameLength=50, numDistractors=4, memorization=1,
1551         ↪ verbose=1",
1552     ),
1553     (
1554         "SimonSaysWithMemory100Verbose",
1555         "simonsays",
1556         "gameLength=100, numDistractors=4, memorization=1,
1557         ↪ verbose=1",
1558     ),
1559     ("PeckingOrder", "peckingorder", ""),
1560 ]

```

### N.3 ALFWORLD

The 12 games for ALFWORLD. Note that these are from when the "-game-seed" is not set. Changing this value would cause the games to change.

```

1563 valid_seen/pick_and_place_simple-Book-None-SideTable-329/trial_T2
1564 ↪ 0190908_050633_745514
1565 valid_seen/look_at_obj_in_light-AlarmClock-None-DeskLamp-323/tria
1566 ↪ 1_T20190909_044715_250790

```



valid\_seen/pick\_clean\_then\_place\_in\_recep-ButterKnife-None-CounterTop-8/trial\_T20190909\_105559\_983897  
 ↪ rTop-8/trial\_T20190909\_105559\_983897  
 valid\_seen/pick\_heat\_then\_place\_in\_recep-Apple-None-DiningTable-2\_6/trial\_T20190907\_060234\_011675  
 ↪ 6/trial\_T20190907\_060234\_011675  
 valid\_seen/pick\_cool\_then\_place\_in\_recep-Apple-None-CounterTop-14\_10/trial\_T20190909\_044933\_815840  
 ↪ /trial\_T20190909\_044933\_815840  
 valid\_seen/pick\_two\_obj\_and\_place-AlarmClock-None-Dresser-305/trial\_T20190907\_165826\_194855  
 ↪ al\_T20190907\_165826\_194855  
 valid\_unseen/pick\_and\_place\_simple-Mug-None-Desk-308/trial\_T20190908\_125200\_737896  
 ↪ 908\_125200\_737896  
 valid\_unseen/look\_at\_obj\_in\_light-AlarmClock-None-DeskLamp-308/trial\_T20190908\_222917\_366542  
 ↪ ial\_T20190908\_222917\_366542  
 valid\_unseen/pick\_clean\_then\_place\_in\_recep-Bowl-None-Cabinet-10\_6/trial\_T20190909\_061130\_844814  
 ↪ trial\_T20190909\_061130\_844814  
 valid\_unseen/pick\_heat\_then\_place\_in\_recep-Apple-None-Fridge-10\_182259\_116320  
 ↪ rial\_T20190906\_182259\_116320  
 valid\_unseen/pick\_cool\_then\_place\_in\_recep-Bread-None-CounterTop-10\_10/trial\_T20190908\_091747\_866951  
 ↪ 10/trial\_T20190908\_091747\_866951  
 valid\_unseen/pick\_two\_obj\_and\_place-CD-None-Safe-308/trial\_T20190907\_050942\_897916  
 ↪ 907\_050942\_897916

#### N.4 SCIENCEWORLD

We use the first variation of the test set for each of the 30 tasks.

## O ANNOTATED LOGS: CRITERIA AND EXAMPLES

### O.1 LABELING CRITERIA

For spatial reasoning failures, we primarily label those actions that involve failing navigation through path finding, backtracking, or iteratively searching spaces for necessary elements for completing the assigned task. Deductive reasoning failures were primarily actions that involved interaction with game elements that cannot be reasonably linked back to the target objective or failures to solve in-game puzzles. Inductive reasoning failures were comprised mostly of actions that the agent had previously attempted in a near-identical state to negative feedback. If there was any non-trivial change in game state compared to when the action was first attempted, we did not label the action as an inductive reasoning failure if the action did not fail due to a parser issue. Grounded reasoning failures encompassed what is commonly referred to as hallucination: attempts to interact with game elements not mentioned in observations or feedback.

### O.2 SPATIAL REASONING FAILURE EXAMPLE

Task Description:Your task is to melt lead. First, focus on the substance. Then, take actions that will cause it to change its state of matter...

...

This room is called the kitchen. In it, you see:

the agent  
 a substance called air  
 a chair. On the chair is: nothing.  
 a counter. On the counter is: a bowl (containing a red  
 ↪ apple, a banana, an orange, a potato), a drawer.  
 a cupboard. The cupboard door is closed.  
 a freezer. The freezer door is closed.  
 a fridge. The fridge door is closed.  
 a glass jar (containing a substance called sodium  
 ↪ chloride)

1620 a lighter  
 1621 a oven, which is turned off. The oven door is closed.  
 1622 a painting  
 1623 a sink, which is turned off. In the sink is: nothing.  
 1624 a substance called soap  
 1625 a stopwatch, which is deactivated.  
 1626 a stove, which is turned off. On the stove is: nothing.  
 1627 a table. On the table is: a glass cup (containing  
 1628 ↪ nothing).  
 1629 a thermometer, currently reading a temperature of 10  
 1630 ↪ degrees celsius  
 1631 You also see:  
 1632 A door to the bathroom (that is open)  
 1633 A door to the hallway (that is closed)  
 1634 A door to the outside (that is closed)  
 1635 >  
 1636 Action: open oven  
 1637 ...  
 1638 Action: go hallway  
 1639 ...  
 1640 ...  
 1641 Action: go workshop  
 1642 ...  
 1643 ...  
 1644 This room is called the workshop. In it, you see:  
 1645 the agent  
 1646 a substance called air  
 1647 a table. On the table is: a battery, a green wire, a metal  
 1648 ↪ pot (containing a substance called lead), a orange  
 1649 ↪ light bulb, which is off, a orange wire, a red wire, a  
 1650 ↪ switch, which is off, a violet light bulb, which is  
 1651 ↪ off, a yellow light bulb, which is off.  
 1652 a ultra low temperature freezer. The ultra low temperature  
 1653 ↪ freezer door is closed.  
 1654 You also see:  
 1655 A door to the hallway (that is open)  
 1656 >  
 1657 Action: pick up metal pot  
 1658 You move the metal pot to the inventory.  
 1659 Action: go kitchen  
 1660  
 1661  
 1662  
 1663 Above we provide an example of a spatial reasoning failure from Claude-3.5-Haiku in ScienceWorld-  
 1664 Melt. The agent navigates to the workshop, through the hallway and thus should realize the path is  
 1665 kitchen to hallway to workshop. However, despite this, the agent attempts the action **go kitchen**.  
 1666  
 1667 **O.3 DEDUCTIVE REASONING FAILURE EXAMPLE**  
 1668  
 1669 Task Description: Your task is to freeze lead. First, focus on the  
 1670 ↪ substance. Then, take actions that will cause it to change its  
 1671 ↪ state of matter.  
 1672  
 1673 ...

1674 Action: look around  
 1675  
 1676 This room is called the kitchen. In it, you see:  
 1677     the agent  
 1678     a substance called air  
 1679     a chair. On the chair is: nothing.  
 1680     a counter. On the counter is: a bowl (containing a red  
 1681     ↪ apple, a banana, an orange, a potato), a drawer.  
 1682     a cupboard. The cupboard door is closed.  
 1683     a freezer. The freezer door is closed.  
 1684     a fridge. The fridge door is closed.  
 1685     a glass jar (containing a substance called sodium  
 1686     ↪ chloride)  
 1687     a lighter  
 1688     a oven, which is turned off. The oven door is closed.  
 1689     a painting  
 1690     a sink, which is turned off. In the sink is: nothing.  
 1691     a substance called soap  
 1692     a stopwatch, which is deactivated.  
 1693     a stove, which is turned off. On the stove is: nothing.  
 1694     a table. On the table is: a glass cup (containing  
 1695     ↪ nothing).  
 1696     a thermometer, currently reading a temperature of 10  
 1697     ↪ degrees celsius  
 1698 You also see:  
 1699     A door to the bathroom (that is open)  
 1700     A door to the hallway (that is closed)  
 1701     A door to the outside (that is closed)  
 1702  
 1703 Action: open freezer  
 1704  
 1705 Above we provide an example of a spatial reasoning failure from Claude-3.7-Sonnet (zero-shot)  
 1706 in ScienceWorldFreeze. While looking for lead, the agent checks a kitchen freezer, an extremely  
 1707 unlikely place to find lead.  
 1708  
 1709 O.4 INDUCTIVE REASONING FAILURE EXAMPLE  
 1710  
 1711 ...  
 1712 If you pray enough, your prayers may be answered.  
 1713 Action: pray  
 1714  
 1715 If you pray enough, your prayers may be answered.  
 1716 Action: pray  
 1717  
 1718 If you pray enough, your prayers may be answered.  
 1719 Action: pray  
 1720  
 1721 If you pray enough, your prayers may be answered.  
 1722 Action: pray  
 1723  
 1724 If you pray enough, your prayers may be answered.  
 1725 Action: pray  
 1726  
 1727 ...

Above we provide an example of an inductive reasoning failure from Claude-3.5-Haiku in ZORK1. While the game environment returns a signal that praying might result in some change, Claude-3.5-Haiku continues to do this for 36 steps, far past when most reasonable players would have moved on.

## O.5 GROUNDED REASONING FAILURE EXAMPLE

This room is called the workshop. In it, you see:

the agent  
a substance called air  
a table. On the table is: a battery, a green wire, a  
→ orange light bulb, which is off, a orange wire, a red  
→ wire, a switch, which is off, a violet light bulb,  
→ which is off, a yellow light bulb, which is off.  
a ultra low temperature freezer. The ultra low temperature  
→ freezer door is closed.

You also see:

A door to the hallway (that is open)

...

Action: go to hallway

You move to the hallway.

...

Action: go to hallway

You move to the hallway.

Action: go to kitchen

You move to the kitchen.

Action: use lighter on lead

The lighter heats up the lead a small amount.

Action: take red wire

Above we provide an example of an inductive reasoning failure from Claude-3.7-Sonnet (Thinking) in ScienceWorldBoil. We see the agent attempt to interact with an item in its context despite having moved to another location where the item is no longer present.

## P DATA CONTAMINATION EVIDENCE FROM THINKING TRACES: EXAMPLES

The blue glow of my sword suggests there's a danger nearby, likely  
→ something from Zork lore (like a grue). Let me explore the  
→ available paths carefully. I have the lantern on, which should  
→ protect me from grues in dark areas. Let me try going north  
→ first.

An example of a thinking trace from the Claude-3.7-Sonnet thinking mode that leads us to strongly suspect data contamination. Most notably, the thinking traces references a *grue*, a creature from ZORK1 mythology that had not at all been previously mentioned in the game's history.

## Q HYPERPARAMETERS

The following is the command used to run experiments across 5 seeds. All arguments not included are default values.

```
for i in {{1..5}}; do
  python benchmark.py --agent agents/llm.py zero-shot --env
    ↪ jericho scienceworld textworld textworld_express alfworld
    ↪ --llm $LLM          --context 100 --nb-steps 100 --conversation
    ↪ --wandb --seed "20241106${(i)}" &
  sleep 60
done
```
